# Supplementary material for: De Novo Characterization of the Mung Bean Transcriptome and Transcriptomic Analysis of Adventitious Rooting in Seedlings Using RNA-Seq
Source: PubMed Central journal article supplement (PMC4503682; doi:10.1371/journal.pone.0132969), 2015-07-15
Supplement: pone.0132969.s007.pdf [file pone.0132969.s007.pdf]

S3 Table. Top 10 significant GOs in the three samples

| GO ID      | Total Gene num | DEGs num | FDR      | Level | Terms                                                       |
|------------|----------------|----------|----------|-------|-------------------------------------------------------------|
| Wat6       |                |          |          |       |                                                             |
| GO:0016491 | 1856           | 571      | 1.81E-14 | 3     | oxidoreductase activity                                     |
| GO:1901700 | 1372           | 428      | 2.33E-11 | 4     | response to oxygen-containing compound                      |
| GO:0005576 | 1222           | 387      | 2.98E-11 | 2     | extracellular region                                        |
| GO:0001071 | 1345           | 417      | 6.13E-11 | 2     | nucleic acid binding transcription factor activity          |
| GO:0003700 | 1345           | 417      | 6.13E-11 | 3     | sequence-specific DNA binding transcription factor activity |
| GO:0015979 | 192            | 86       | 5.45E-09 | 4     | photosynthesis                                              |
| GO:0042221 | 2287           | 643      | 1.21E-08 | 3     | response to chemical stimulus                               |
| GO:0009637 | 73             | 43       | 1.60E-08 | 6     | response to blue light                                      |
| GO:0006979 | 368            | 138      | 2.59E-08 | 4     | response to oxidative stress                                |
| GO:0046906 | 485            | 171      | 4.00E-08 | 4     | tetrapyrrole binding                                        |
| Wat24      |                |          |          |       |                                                             |
| GO:0003735 | 471            | 283      | 1.37E-75 | 3     | structural constituent of ribosome                          |
| GO:0005840 | 538            | 307      | 6.59E-75 | 4     | ribosome                                                    |
| GO:0005198 | 606            | 304      | 5.99E-57 | 2     | structural molecule activity                                |
| GO:0044391 | 216            | 147      | 3.23E-48 | 4     | ribosomal subunit                                           |
| GO:0022626 | 198            | 135      | 2.37E-44 | 5     | cytosolic ribosome                                          |
| GO:0006412 | 671            | 301      | 1.24E-43 | 6     | translation                                                 |
| GO:0030529 | 801            | 328      | 1.31E-37 | 3     | ribonucleoprotein complex                                   |
| GO:0044445 | 243            | 139      | 3.99E-33 | 5     | cytosolic part                                              |
| GO:0022625 | 96             | 74       | 1.64E-29 | 6     | cytosolic large ribosomal subunit                           |
| GO:0015934 | 125            | 85       | 2.00E-27 | 5     | large ribosomal subunit                                     |
| GO:0005576 | 1222           | 415      | 2.65E-26 | 2     | extracellular region                                        |
| Wat24:Wat6 |                |          |          |       |                                                             |
| GO:0005840 | 538            | 175      | 1.03E-26 | 4     | ribosome                                                    |
| GO:0003735 | 471            | 156      | 8.92E-25 | 3     | structural constituent of ribosome                          |
| GO:0005198 | 606            | 175      | 1.68E-20 | 2     | structural molecule activity                                |
| GO:0006412 | 671            | 176      | 6.93E-16 | 6     | translation                                                 |
| GO:0005576 | 1222           | 272      | 7.80E-15 | 2     | extracellular region                                        |
| GO:0044391 | 216            | 77       | 1.19E-13 | 4     | ribosomal subunit                                           |
| GO:0046906 | 485            | 133      | 1.75E-13 | 4     | tetrapyrrole binding                                        |
| GO:0016491 | 1856           | 372      | 1.75E-13 | 3     | oxidoreductase activity                                     |
| GO:0020037 | 452            | 125      | 6.13E-13 | 5     | heme binding                                                |
| GO:0022626 | 198            | 71       | 7.60E-13 | 5     | cytosolic ribosome                                          |
