# Supplementary material for: De Novo Characterization of the Mung Bean Transcriptome and Transcriptomic Analysis of Adventitious Rooting in Seedlings Using RNA-Seq
Source: PubMed Central journal article supplement (PMC4503682; doi:10.1371/journal.pone.0132969), 2015-07-15
Supplement: pone.0132969.s008.pdf [file pone.0132969.s008.pdf]

S4 Table. Top list of significant up- and down-regulated GOs

## Top dif GO enrichment-wat6:con-up

| GO ID      | All num | DEGs num | P-value  | FDR      | Level | Term                                                    | Type               |
|------------|---------|----------|----------|----------|-------|---------------------------------------------------------|--------------------|
| GO:0005198 | 606     | 152      | 2.73E-32 | 4.09E-29 | 2     | structural molecule activity                            | molecular_function |
| GO:0005576 | 1222    | 221      | 1.31E-24 | 6.56E-22 | 2     | extracellular region                                    | cellular_component |
| GO:0044421 | 174     | 48       | 1.16E-12 | 1.86E-10 | 2     | extracellular region part                               | cellular_component |
| GO:0009055 | 462     | 85       | 1.79E-10 | 2.30E-08 | 2     | electron carrier activity                               | molecular_function |
| GO:0016209 | 188     | 46       | 2.90E-10 | 3.44E-08 | 2     | antioxidant activity                                    | molecular_function |
| GO:0005215 | 1416    | 188      | 3.41E-08 | 2.33E-06 | 2     | transporter activity                                    | molecular_function |
| GO:0030054 | 727     | 109      | 9.11E-08 | 5.55E-06 | 2     | cell junction                                           | cellular_component |
| GO:0055044 | 694     | 105      | 9.95E-08 | 5.82E-06 | 2     | symplast                                                | cellular_component |
| GO:0045735 | 76      | 18       | 0.000116 | 0.002727 | 2     | nutrient reservoir activity                             | molecular_function |
| GO:0003735 | 471     | 140      | 1.82E-38 | 8.19E-35 | 3     | structural constituent of ribosome                      | molecular_function |
| GO:0016491 | 1856    | 320      | 6.30E-32 | 7.09E-29 | 3     | oxidoreductase activity                                 | molecular_function |
| GO:0030529 | 801     | 161      | 8.70E-23 | 3.92E-20 | 3     | ribonucleoprotein complex                               | cellular_component |
| GO:0005615 | 141     | 47       | 7.34E-16 | 2.36E-13 | 3     | extracellular space                                     | cellular_component |
| GO:0030312 | 671     | 120      | 2.27E-13 | 5.12E-11 | 3     | external encapsulating structure                        | cellular_component |
| GO:0044710 | 3304    | 412      | 4.60E-13 | 9.02E-11 | 3     | single-organism metabolic process                       | biological_process |
| GO:0048037 | 658     | 117      | 6.84E-13 | 1.14E-10 | 3     | cofactor binding                                        | molecular_function |
| GO:0042221 | 2287    | 293      | 1.44E-10 | 1.97E-08 | 3     | response to chemical stimulus                           | biological_process |
| GO:0004601 | 164     | 42       | 3.78E-10 | 4.26E-08 | 3     | peroxidase activity                                     | molecular_function |
| GO:0051240 | 97      | 29       | 4.39E-09 | 3.88E-07 | 3     | positive regulation of multicellular organismal process | biological_process |
| GO:0004857 | 161     | 38       | 2.85E-08 | 2.00E-06 | 3     | enzyme inhibitor activity                               | molecular_function |
| GO:0061134 | 58      | 20       | 7.80E-08 | 4.88E-06 | 3     | peptidase regulator activity                            | molecular_function |
| GO:0005911 | 702     | 106      | 9.57E-08 | 5.75E-06 | 3     | cell-cell junction                                      | cellular_component |
| GO:0009506 | 694     | 105      | 9.95E-08 | 5.82E-06 | 3     | plasmodesma                                             | cellular_component |
| GO:0070469 | 113     | 28       | 6.40E-07 | 3.14E-05 | 3     | respiratory chain                                       | cellular_component |
| GO:0022892 | 1051    | 142      | 6.69E-07 | 3.20E-05 | 3     | substrate-specific transporter activity                 | molecular_function |
| GO:0044765 | 1550    | 192      | 3.14E-06 | 0.000135 | 3     | single-organism transport                               | biological_process |
| GO:0043228 | 1628    | 200      | 3.35E-06 | 0.00014  | 3     | non-membrane-bounded organelle                          | cellular_component |
| GO:0034358 | 13      | 8        | 3.76E-06 | 0.000156 | 3     | plasma lipoprotein particle                             | cellular_component |
| GO:0032994 | 14      | 8        | 8.08E-06 | 0.000303 | 3     | protein-lipid complex                                   | cellular_component |
| GO:0016829 | 359     | 58       | 1.02E-05 | 0.000374 | 3     | lyase activity                                          | molecular_function |
| GO:0022857 | 1145    | 146      | 1.16E-05 | 0.000393 | 3     | transmembrane transporter activity                      | molecular_function |
| GO:1901681 | 37      | 13       | 1.17E-05 | 0.000393 | 3     | sulfur compound binding                                 | molecular_function |
| GO:0009719 | 1364    | 166      | 3.99E-05 | 0.001159 | 3     | response to endogenous stimulus                         | biological_process |
| GO:0071944 | 3429    | 372      | 4.83E-05 | 0.001352 | 3     | cell periphery                                          | cellular_component |
| GO:0031224 | 4742    | 497      | 6.75E-05 | 0.001779 | 3     | intrinsic to membrane                                   | cellular_component |
| GO:0005577 | 7       | 5        | 0.000108 | 0.002586 | 3     | fibrinogen complex                                      | cellular_component |
| GO:0097367 | 40      | 12       | 0.000147 | 0.00334  | 3     | carbohydrate derivative binding                         | molecular_function |

## Top 50 dif GO enrichment-wat6:con-up

| GO ID      | All num | DEGs num | P-value  | FDR      | Level | Term                               | Type               |
|------------|---------|----------|----------|----------|-------|------------------------------------|--------------------|
| GO:0003735 | 471     | 140      | 1.82E-38 | 8.19E-35 | 3     | structural constituent of ribosome | molecular_function |
| GO:0005840 | 538     | 149      | 6.13E-37 | 1.38E-33 | 4     | ribosome                           | cellular_component |
| GO:0005198 | 606     | 152      | 2.73E-32 | 4.09E-29 | 2     | structural molecule activity       | molecular_function |
| GO:0016491 | 1856    | 320      | 6.30E-32 | 7.09E-29 | 3     | oxidoreductase activity            | molecular_function |
| GO:0022626 | 198     | 77       | 3.43E-30 | 3.09E-27 | 5     | cytosolic ribosome                 | cellular_component |
| GO:0044445 | 243     | 82       | 4.49E-27 | 3.37E-24 | 5     | cytosolic part                     | cellular_component |

|            |      |     |          |          |   |                                                         |                    |
|------------|------|-----|----------|----------|---|---------------------------------------------------------|--------------------|
| GO:0006412 | 671  | 151 | 1.25E-26 | 8.03E-24 | 6 | translation                                             | biological_process |
| GO:0044391 | 216  | 76  | 1.65E-26 | 9.29E-24 | 4 | ribosomal subunit                                       | cellular_component |
| GO:0005576 | 1222 | 221 | 1.31E-24 | 6.56E-22 | 2 | extracellular region                                    | cellular_component |
| GO:0030529 | 801  | 161 | 8.70E-23 | 3.92E-20 | 3 | ribonucleoprotein complex                               | cellular_component |
| GO:0020037 | 452  | 103 | 6.93E-19 | 2.84E-16 | 5 | heme binding                                            | molecular_function |
| GO:0022625 | 96   | 40  | 1.36E-17 | 5.10E-15 | 6 | cytosolic large ribosomal subunit                       | cellular_component |
| GO:0046906 | 485  | 105 | 1.54E-17 | 5.33E-15 | 4 | tetrapyrrole binding                                    | molecular_function |
| GO:0005615 | 141  | 47  | 7.34E-16 | 2.36E-13 | 3 | extracellular space                                     | cellular_component |
| GO:0000302 | 241  | 62  | 2.10E-14 | 6.31E-12 | 5 | response to reactive oxygen species                     | biological_process |
| GO:0015935 | 91   | 35  | 2.66E-14 | 7.48E-12 | 5 | small ribosomal subunit                                 | cellular_component |
| GO:0005618 | 654  | 120 | 3.54E-14 | 9.38E-12 | 4 | cell wall                                               | cellular_component |
| GO:0006979 | 368  | 80  | 9.08E-14 | 2.25E-11 | 4 | response to oxidative stress                            | biological_process |
| GO:0015934 | 125  | 41  | 9.50E-14 | 2.25E-11 | 5 | large ribosomal subunit                                 | cellular_component |
| GO:0030312 | 671  | 120 | 2.27E-13 | 5.12E-11 | 3 | external encapsulating structure                        | cellular_component |
| GO:0043436 | 1141 | 177 | 3.54E-13 | 7.59E-11 | 5 | oxoacid metabolic process                               | biological_process |
| GO:0042542 | 164  | 47  | 4.34E-13 | 8.89E-11 | 5 | response to hydrogen peroxide                           | biological_process |
| GO:0044710 | 3304 | 412 | 4.60E-13 | 9.02E-11 | 3 | single-organism metabolic process                       | biological_process |
| GO:0006082 | 1147 | 177 | 5.66E-13 | 1.05E-10 | 4 | organic acid metabolic process                          | biological_process |
| GO:0005506 | 489  | 95  | 5.81E-13 | 1.05E-10 | 7 | iron ion binding                                        | molecular_function |
| GO:0022627 | 62   | 27  | 6.84E-13 | 1.14E-10 | 6 | cytosolic small ribosomal subunit                       | cellular_component |
| GO:0048037 | 658  | 117 | 6.84E-13 | 1.14E-10 | 3 | cofactor binding                                        | molecular_function |
| GO:0044421 | 174  | 48  | 1.16E-12 | 1.86E-10 | 2 | extracellular region part                               | cellular_component |
| GO:0044711 | 911  | 147 | 2.03E-12 | 3.15E-10 | 4 | single-organism biosynthetic process                    | biological_process |
| GO:0044444 | 6765 | 746 | 7.32E-12 | 1.10E-09 | 4 | cytoplasmic part                                        | cellular_component |
| GO:0019752 | 1091 | 163 | 6.73E-11 | 9.79E-09 | 6 | carboxylic acid metabolic process                       | biological_process |
| GO:1901605 | 361  | 72  | 1.10E-10 | 1.55E-08 | 5 | alpha-amino acid metabolic process                      | biological_process |
| GO:0042221 | 2287 | 293 | 1.44E-10 | 1.97E-08 | 3 | response to chemical stimulus                           | biological_process |
| GO:0015291 | 349  | 70  | 1.54E-10 | 2.04E-08 | 5 | secondary active transmembrane transporter activity     | molecular_function |
| GO:0009055 | 462  | 85  | 1.79E-10 | 2.30E-08 | 2 | electron carrier activity                               | molecular_function |
| GO:0042743 | 131  | 37  | 2.08E-10 | 2.61E-08 | 5 | hydrogen peroxide metabolic process                     | biological_process |
| GO:0050662 | 473  | 86  | 2.59E-10 | 3.15E-08 | 4 | coenzyme binding                                        | molecular_function |
| GO:0016209 | 188  | 46  | 2.90E-10 | 3.44E-08 | 2 | antioxidant activity                                    | molecular_function |
| GO:0004601 | 164  | 42  | 3.78E-10 | 4.26E-08 | 3 | peroxidase activity                                     | molecular_function |
| GO:0016684 | 164  | 42  | 3.78E-10 | 4.26E-08 | 4 | oxidoreductase activity, acting on peroxide as acceptor | molecular_function |
| GO:0010378 | 9    | 9   | 4.00E-10 | 4.39E-08 | 4 | temperature compensation of the circadian clock         | biological_process |
| GO:0044283 | 769  | 122 | 4.93E-10 | 5.29E-08 | 5 | small molecule biosynthetic process                     | biological_process |
| GO:0034614 | 141  | 38  | 5.30E-10 | 5.55E-08 | 6 | cellular response to reactive oxygen species            | biological_process |
| GO:0034599 | 148  | 39  | 6.47E-10 | 6.62E-08 | 5 | cellular response to oxidative stress                   | biological_process |
| GO:0016053 | 651  | 107 | 7.97E-10 | 7.81E-08 | 5 | organic acid biosynthetic process                       | biological_process |
| GO:0046394 | 651  | 107 | 7.97E-10 | 7.81E-08 | 6 | carboxylic acid biosynthetic process                    | biological_process |
| GO:0042744 | 114  | 33  | 9.72E-10 | 9.32E-08 | 5 | hydrogen peroxide catabolic process                     | biological_process |
| GO:0070301 | 121  | 34  | 1.29E-09 | 1.21E-07 | 6 | cellular response to hydrogen peroxide                  | biological_process |
| GO:0005739 | 1317 | 182 | 2.93E-09 | 2.70E-07 | 5 | mitochondrion                                           | cellular_component |
| GO:0055114 | 563  | 94  | 3.86E-09 | 3.48E-07 | 4 | oxidation-reduction process                             | biological_process |

#### Top list dif GO enrichment-wat6:con-down

| GO ID      | All num | DEGs num | P-value  | FDR      | Level | Term                                               | Type               |
|------------|---------|----------|----------|----------|-------|----------------------------------------------------|--------------------|
| GO:0001071 | 1345    | 330      | 4.60E-30 | 1.08E-26 | 2     | nucleic acid binding transcription factor activity | molecular_function |

|            |       |      |          |          |   |                                                             |                    |
|------------|-------|------|----------|----------|---|-------------------------------------------------------------|--------------------|
| GO:0005488 | 12800 | 1821 | 1.14E-05 | 0.000505 | 2 | binding                                                     | molecular_function |
| GO:0050789 | 4100  | 634  | 1.46E-05 | 0.000618 | 2 | regulation of biological process                            | biological_process |
| GO:0050896 | 5231  | 791  | 2.23E-05 | 0.000877 | 2 | response to stimulus                                        | biological_process |
| GO:0065007 | 4447  | 680  | 2.76E-05 | 0.001051 | 2 | biological regulation                                       | biological_process |
| GO:0023052 | 1715  | 278  | 0.000319 | 0.008585 | 2 | signaling                                                   | biological_process |
| GO:0003700 | 1345  | 330  | 4.60E-30 | 1.08E-26 | 3 | sequence-specific DNA binding transcription factor activity | molecular_function |
| GO:0034357 | 276   | 87   | 4.58E-15 | 1.43E-12 | 3 | photosynthetic membrane                                     | cellular_component |
| GO:0009521 | 79    | 38   | 1.03E-13 | 2.20E-11 | 3 | photosystem                                                 | cellular_component |
| GO:0009628 | 1566  | 291  | 1.53E-09 | 1.40E-07 | 3 | response to abiotic stimulus                                | biological_process |
| GO:1901363 | 9640  | 1422 | 1.30E-07 | 9.24E-06 | 3 | heterocyclic compound binding                               | molecular_function |
| GO:0019222 | 2140  | 367  | 1.36E-07 | 9.43E-06 | 3 | regulation of metabolic process                             | biological_process |
| GO:0097159 | 9651  | 1422 | 1.79E-07 | 1.21E-05 | 3 | organic cyclic compound binding                             | molecular_function |
| GO:0003682 | 340   | 79   | 5.24E-07 | 3.32E-05 | 3 | chromatin binding                                           | molecular_function |
| GO:0050794 | 3519  | 561  | 1.42E-06 | 7.90E-05 | 3 | regulation of cellular process                              | biological_process |
| GO:0009791 | 1125  | 201  | 9.09E-06 | 0.000413 | 3 | post-embryonic development                                  | biological_process |
| GO:0051656 | 63    | 22   | 1.23E-05 | 0.000534 | 3 | establishment of organelle localization                     | biological_process |
| GO:0009654 | 17    | 10   | 1.48E-05 | 0.000618 | 3 | oxygen evolving complex                                     | cellular_component |
| GO:0042754 | 5     | 5    | 4.35E-05 | 0.001604 | 3 | negative regulation of circadian rhythm                     | biological_process |
| GO:0006807 | 6258  | 929  | 5.30E-05 | 0.001912 | 3 | nitrogen compound metabolic process                         | biological_process |
| GO:0009719 | 1364  | 231  | 7.82E-05 | 0.002635 | 3 | response to endogenous stimulus                             | biological_process |
| GO:0010166 | 28    | 12   | 0.000126 | 0.003907 | 3 | wax metabolic process                                       | biological_process |
| GO:0019898 | 37    | 14   | 0.000175 | 0.005136 | 3 | extrinsic to membrane                                       | cellular_component |
| GO:0044700 | 1710  | 276  | 0.000441 | 0.011169 | 3 | single organism signaling                                   | biological_process |
| GO:0006950 | 3162  | 484  | 0.000498 | 0.012404 | 3 | response to stress                                          | biological_process |
| GO:0010073 | 95    | 25   | 0.000592 | 0.0146   | 3 | meristem maintenance                                        | biological_process |

#### Top 50 dif GO enrichment-wat6:con-down

| GO ID      | All num | DEGs num | P-value  | FDR      | Level | Term                                                        | Type               |
|------------|---------|----------|----------|----------|-------|-------------------------------------------------------------|--------------------|
| GO:0001071 | 1345    | 330      | 4.60E-30 | 1.08E-26 | 2     | nucleic acid binding transcription factor activity          | molecular_function |
| GO:0003700 | 1345    | 330      | 4.60E-30 | 1.08E-26 | 3     | sequence-specific DNA binding transcription factor activity | molecular_function |
| GO:0032774 | 2282    | 480      | 1.05E-26 | 1.24E-23 | 6     | RNA biosynthetic process                                    | biological_process |
| GO:0006351 | 2276    | 479      | 1.06E-26 | 1.24E-23 | 6     | transcription, DNA-dependent                                | biological_process |
| GO:0044271 | 2774    | 550      | 3.01E-24 | 2.82E-21 | 5     | cellular nitrogen compound biosynthetic process             | biological_process |
| GO:0034654 | 2580    | 511      | 2.65E-22 | 2.07E-19 | 5     | nucleobase-containing compound biosynthetic process         | biological_process |
| GO:0018130 | 2786    | 542      | 6.49E-22 | 4.34E-19 | 5     | heterocycle biosynthetic process                            | biological_process |
| GO:0003677 | 2302    | 460      | 9.48E-21 | 5.56E-18 | 5     | DNA binding                                                 | molecular_function |
| GO:0019438 | 2870    | 549      | 1.60E-20 | 8.31E-18 | 5     | aromatic compound biosynthetic process                      | biological_process |
| GO:0015979 | 192     | 77       | 2.82E-20 | 1.32E-17 | 4     | photosynthesis                                              | biological_process |
| GO:1901362 | 2982    | 561      | 2.36E-19 | 1.00E-16 | 5     | organic cyclic compound biosynthetic process                | biological_process |
| GO:0044436 | 299     | 93       | 1.33E-15 | 5.20E-13 | 4     | thylakoid part                                              | cellular_component |
| GO:0009579 | 383     | 110      | 1.86E-15 | 6.69E-13 | 4     | thylakoid                                                   | cellular_component |
| GO:0016070 | 2943    | 534      | 3.52E-15 | 1.18E-12 | 5     | RNA metabolic process                                       | biological_process |
| GO:0034357 | 276     | 87       | 4.58E-15 | 1.43E-12 | 3     | photosynthetic membrane                                     | cellular_component |
| GO:0044434 | 960     | 214      | 1.05E-14 | 3.07E-12 | 5     | chloroplast part                                            | cellular_component |
| GO:0044435 | 972     | 215      | 2.11E-14 | 5.83E-12 | 4     | plastid part                                                | cellular_component |
| GO:0031976 | 312     | 93       | 2.43E-14 | 6.00E-12 | 5     | plastid thylakoid                                           | cellular_component |
| GO:0009534 | 312     | 93       | 2.43E-14 | 6.00E-12 | 6     | chloroplast thylakoid                                       | cellular_component |
| GO:0006355 | 1265    | 264      | 3.01E-14 | 6.72E-12 | 6     | regulation of transcription, DNA-dependent                  | biological_process |

|            |      |     |          |          |   |                                                                |                    |
|------------|------|-----|----------|----------|---|----------------------------------------------------------------|--------------------|
| GO:2001141 | 1265 | 264 | 3.01E-14 | 6.72E-12 | 6 | regulation of RNA biosynthetic process                         | biological_process |
| GO:0009521 | 79   | 38  | 1.03E-13 | 2.20E-11 | 3 | photosystem                                                    | cellular_component |
| GO:0051252 | 1292 | 266 | 1.24E-13 | 2.53E-11 | 5 | regulation of RNA metabolic process                            | biological_process |
| GO:0009416 | 589  | 144 | 2.02E-13 | 3.95E-11 | 5 | response to light stimulus                                     | biological_process |
| GO:0042651 | 262  | 80  | 3.85E-13 | 7.22E-11 | 4 | thylakoid membrane                                             | cellular_component |
| GO:0009314 | 617  | 147 | 9.80E-13 | 1.77E-10 | 4 | response to radiation                                          | biological_process |
| GO:0055035 | 250  | 76  | 1.90E-12 | 3.18E-10 | 5 | plastid thylakoid membrane                                     | cellular_component |
| GO:0009535 | 250  | 76  | 1.90E-12 | 3.18E-10 | 6 | chloroplast thylakoid membrane                                 | cellular_component |
| GO:0009507 | 1876 | 353 | 4.00E-12 | 6.46E-10 | 6 | chloroplast                                                    | cellular_component |
| GO:0018298 | 59   | 30  | 6.59E-12 | 1.03E-09 | 7 | protein-chromophore linkage                                    | biological_process |
| GO:0031984 | 349  | 94  | 1.19E-11 | 1.80E-09 | 4 | organelle subcompartment                                       | cellular_component |
| GO:0000155 | 44   | 25  | 1.51E-11 | 2.02E-09 | 4 | phosphorelay sensor kinase activity                            | molecular_function |
| GO:0023014 | 44   | 25  | 1.51E-11 | 2.02E-09 | 5 | signal transduction by phosphorylation                         | biological_process |
| GO:0016775 | 44   | 25  | 1.51E-11 | 2.02E-09 | 5 | phosphotransferase activity, nitrogenous group as acceptor     | molecular_function |
| GO:0004673 | 44   | 25  | 1.51E-11 | 2.02E-09 | 6 | protein histidine kinase activity                              | molecular_function |
| GO:0019219 | 1422 | 278 | 1.60E-11 | 2.08E-09 | 5 | regulation of nucleobase-containing compound metabolic process | biological_process |
| GO:0009536 | 1965 | 362 | 3.48E-11 | 4.40E-09 | 5 | plastid                                                        | cellular_component |
| GO:0009637 | 73   | 33  | 3.60E-11 | 4.44E-09 | 6 | response to blue light                                         | biological_process |
| GO:0009522 | 37   | 22  | 7.37E-11 | 8.86E-09 | 4 | photosystem I                                                  | cellular_component |
| GO:0009523 | 64   | 30  | 9.09E-11 | 1.07E-08 | 4 | photosystem II                                                 | cellular_component |
| GO:0051171 | 1451 | 279 | 9.37E-11 | 1.07E-08 | 4 | regulation of nitrogen compound metabolic process              | biological_process |
| GO:0003774 | 148  | 50  | 1.91E-10 | 2.14E-08 | 8 | motor activity                                                 | molecular_function |
| GO:2000112 | 1409 | 270 | 2.79E-10 | 3.04E-08 | 6 | regulation of cellular macromolecule biosynthetic process      | biological_process |
| GO:0010556 | 1413 | 270 | 3.75E-10 | 3.99E-08 | 5 | regulation of macromolecule biosynthetic process               | biological_process |
| GO:0031326 | 1470 | 279 | 3.83E-10 | 3.99E-08 | 5 | regulation of cellular biosynthetic process                    | biological_process |
| GO:0043565 | 507  | 118 | 8.00E-10 | 8.15E-08 | 6 | sequence-specific DNA binding                                  | molecular_function |
| GO:0003777 | 97   | 37  | 9.35E-10 | 9.32E-08 | 9 | microtubule motor activity                                     | molecular_function |
| GO:0009638 | 23   | 16  | 1.03E-09 | 9.91E-08 | 5 | phototropism                                                   | biological_process |
| GO:0009889 | 1503 | 282 | 1.04E-09 | 9.91E-08 | 4 | regulation of biosynthetic process                             | biological_process |
| GO:0031323 | 1771 | 323 | 1.47E-09 | 1.38E-07 | 4 | regulation of cellular metabolic process                       | biological_process |
| GO:0009628 | 1566 | 291 | 1.53E-09 | 1.40E-07 | 3 | response to abiotic stimulus                                   | biological_process |

#### Top 50 dif GO enrichment-wat24:con-up

| GO ID      | All num | DEGs num | P-value    | FDR       | Level | Term                                          | Type               |
|------------|---------|----------|------------|-----------|-------|-----------------------------------------------|--------------------|
| GO:0005198 | 606     | 289      | 9.46E-117  | 1.48E-113 | 2     | structural molecule activity                  | molecular_function |
| GO:0005576 | 1222    | 282      | 1.61E-34   | 5.39E-32  | 2     | extracellular region                          | cellular_component |
| GO:0032991 | 2491    | 466      | 1.10E-32   | 3.44E-30  | 2     | macromolecular complex                        | cellular_component |
| GO:0016209 | 188     | 64       | 6.01E-17   | 1.13E-14  | 2     | antioxidant activity                          | molecular_function |
| GO:0030054 | 727     | 136      | 7.87E-10   | 8.99E-08  | 2     | cell junction                                 | cellular_component |
| GO:0055044 | 694     | 130      | 1.72E-09   | 1.83E-07  | 2     | symplast                                      | cellular_component |
| GO:0044421 | 174     | 45       | 4.80E-08   | 3.51E-06  | 2     | extracellular region part                     | cellular_component |
| GO:0045735 | 76      | 25       | 3.69E-07   | 2.28E-05  | 2     | nutrient reservoir activity                   | molecular_function |
| GO:0009055 | 462     | 79       | 7.66E-05   | 0.0028453 | 2     | electron carrier activity                     | molecular_function |
| GO:0071840 | 2261    | 303      | 0.00028231 | 0.008869  | 2     | cellular component organization or biogenesis | biological_process |
| GO:0003735 | 471     | 277      | 1.25E-142  | 2.94E-139 | 3     | structural constituent of ribosome            | molecular_function |
| GO:0030529 | 801     | 312      | 3.29E-97   | 3.08E-94  | 3     | ribonucleoprotein complex                     | cellular_component |
| GO:0043228 | 1628    | 418      | 5.35E-66   | 2.78E-63  | 3     | non-membrane-bounded organelle                | cellular_component |
| GO:0030312 | 671     | 157      | 5.22E-20   | 1.36E-17  | 3     | external encapsulating structure              | cellular_component |
| GO:0016491 | 1856    | 326      | 5.15E-18   | 1.15E-15  | 3     | oxidoreductase activity                       | molecular_function |

|            |      |     |            |           |   |                                      |                    |
|------------|------|-----|------------|-----------|---|--------------------------------------|--------------------|
| GO:0004601 | 164  | 59  | 5.21E-17   | 1.02E-14  | 3 | peroxidase activity                  | molecular_function |
| GO:0005615 | 141  | 43  | 4.13E-10   | 4.96E-08  | 3 | extracellular space                  | cellular_component |
| GO:0005911 | 702  | 133 | 5.20E-10   | 6.08E-08  | 3 | cell-cell junction                   | cellular_component |
| GO:0004857 | 161  | 46  | 1.12E-09   | 1.25E-07  | 3 | enzyme inhibitor activity            | molecular_function |
| GO:0009506 | 694  | 130 | 1.72E-09   | 1.83E-07  | 3 | plasmodesma                          | cellular_component |
| GO:0071944 | 3429 | 486 | 1.84E-09   | 1.91E-07  | 3 | cell periphery                       | cellular_component |
| GO:0071554 | 437  | 89  | 1.24E-08   | 1.19E-06  | 3 | cell wall organization or biogenesis | biological_process |
| GO:0032993 | 63   | 23  | 1.25E-07   | 8.62E-06  | 3 | protein-DNA complex                  | cellular_component |
| GO:0061134 | 58   | 20  | 2.32E-06   | 0.0001196 | 3 | peptidase regulator activity         | molecular_function |
| GO:0009056 | 1868 | 270 | 3.03E-06   | 0.0001492 | 3 | catabolic process                    | biological_process |
| GO:0044765 | 1550 | 224 | 2.28E-05   | 0.0009887 | 3 | single-organism transport            | biological_process |
| GO:0048046 | 346  | 64  | 3.41E-05   | 0.0014011 | 3 | apoplast                             | cellular_component |
| GO:0031970 | 30   | 11  | 0.00023854 | 0.0078083 | 3 | organelle envelope lumen             | cellular_component |
| GO:0097367 | 40   | 13  | 0.00026729 | 0.0085114 | 3 | carbohydrate derivative binding      | molecular_function |
| GO:0009058 | 5727 | 710 | 0.00034892 | 0.0106058 | 3 | biosynthetic process                 | biological_process |
| GO:0042221 | 2287 | 303 | 0.00060528 | 0.0175983 | 3 | response to chemical stimulus        | biological_process |
| GO:0071814 | 3    | 3   | 0.00139327 | 0.0329388 | 3 | protein-lipid complex binding        | molecular_function |

#### Top 50 dif GO enrichment-wat24:con-up

| GO ID      | All num | DEGs num | P-value   | FDR       | Level | Term                                                    | Type               |
|------------|---------|----------|-----------|-----------|-------|---------------------------------------------------------|--------------------|
| GO:0005840 | 538     | 297      | 1.12E-142 | 2.94E-139 | 4     | ribosome                                                | cellular_component |
| GO:0003735 | 471     | 277      | 1.25E-142 | 2.94E-139 | 3     | structural constituent of ribosome                      | molecular_function |
| GO:0005198 | 606     | 289      | 9.46E-117 | 1.48E-113 | 2     | structural molecule activity                            | molecular_function |
| GO:0006412 | 671     | 288      | 6.72E-102 | 7.86E-99  | 6     | translation                                             | biological_process |
| GO:0030529 | 801     | 312      | 3.29E-97  | 3.08E-94  | 3     | ribonucleoprotein complex                               | cellular_component |
| GO:0044391 | 216     | 146      | 5.55E-87  | 4.33E-84  | 4     | ribosomal subunit                                       | cellular_component |
| GO:0022626 | 198     | 132      | 1.71E-77  | 1.15E-74  | 5     | cytosolic ribosome                                      | cellular_component |
| GO:0043228 | 1628    | 418      | 5.35E-66  | 2.78E-63  | 3     | non-membrane-bounded organelle                          | cellular_component |
| GO:0043232 | 1628    | 418      | 5.35E-66  | 2.78E-63  | 4     | intracellular non-membrane-bounded organelle            | cellular_component |
| GO:0044445 | 243     | 136      | 8.93E-66  | 4.18E-63  | 5     | cytosolic part                                          | cellular_component |
| GO:0022625 | 96      | 74       | 2.89E-51  | 1.23E-48  | 6     | cytosolic large ribosomal subunit                       | cellular_component |
| GO:0015934 | 125     | 84       | 4.84E-50  | 1.89E-47  | 5     | large ribosomal subunit                                 | cellular_component |
| GO:0015935 | 91      | 62       | 8.52E-38  | 3.07E-35  | 5     | small ribosomal subunit                                 | cellular_component |
| GO:0005576 | 1222    | 282      | 1.61E-34  | 5.39E-32  | 2     | extracellular region                                    | cellular_component |
| GO:0032991 | 2491    | 466      | 1.10E-32  | 3.44E-30  | 2     | macromolecular complex                                  | cellular_component |
| GO:0022627 | 62      | 46       | 4.93E-31  | 1.44E-28  | 6     | cytosolic small ribosomal subunit                       | cellular_component |
| GO:0005618 | 654     | 156      | 9.41E-21  | 2.59E-18  | 4     | cell wall                                               | cellular_component |
| GO:0030312 | 671     | 157      | 5.22E-20  | 1.36E-17  | 3     | external encapsulating structure                        | cellular_component |
| GO:0044267 | 2316    | 392      | 7.68E-19  | 1.89E-16  | 5     | cellular protein metabolic process                      | biological_process |
| GO:0042744 | 114     | 49       | 4.60E-18  | 1.08E-15  | 5     | hydrogen peroxide catabolic process                     | biological_process |
| GO:0016491 | 1856    | 326      | 5.15E-18  | 1.15E-15  | 3     | oxidoreductase activity                                 | molecular_function |
| GO:0070301 | 121     | 50       | 1.57E-17  | 3.35E-15  | 6     | cellular response to hydrogen peroxide                  | biological_process |
| GO:0004601 | 164     | 59       | 5.21E-17  | 1.02E-14  | 3     | peroxidase activity                                     | molecular_function |
| GO:0016684 | 164     | 59       | 5.21E-17  | 1.02E-14  | 4     | oxidoreductase activity, acting on peroxide as acceptor | molecular_function |
| GO:0016209 | 188     | 64       | 6.01E-17  | 1.13E-14  | 2     | antioxidant activity                                    | molecular_function |
| GO:0042743 | 131     | 51       | 1.51E-16  | 2.72E-14  | 5     | hydrogen peroxide metabolic process                     | biological_process |
| GO:0020037 | 452     | 112      | 1.78E-16  | 3.08E-14  | 5     | heme binding                                            | molecular_function |
| GO:0046906 | 485     | 115      | 2.13E-15  | 3.56E-13  | 4     | tetrapyrrole binding                                    | molecular_function |
| GO:0034614 | 141     | 51       | 5.24E-15  | 8.46E-13  | 6     | cellular response to reactive oxygen species            | biological_process |
| GO:0034599 | 148     | 51       | 4.92E-14  | 7.68E-12  | 5     | cellular response to oxidative stress                   | biological_process |

|            |      |     |          |          |   |                                           |                    |
|------------|------|-----|----------|----------|---|-------------------------------------------|--------------------|
| GO:0006414 | 50   | 27  | 1.42E-13 | 2.14E-11 | 6 | translational elongation                  | biological_process |
| GO:0072593 | 173  | 55  | 2.35E-13 | 3.44E-11 | 4 | reactive oxygen species metabolic process | biological_process |
| GO:0042542 | 164  | 52  | 1.18E-12 | 1.68E-10 | 5 | response to hydrogen peroxide             | biological_process |
| GO:0003746 | 66   | 30  | 2.24E-12 | 3.09E-10 | 7 | translation elongation factor activity    | molecular_function |
| GO:0005730 | 378  | 89  | 4.89E-12 | 6.54E-10 | 5 | nucleolus                                 | cellular_component |
| GO:0000302 | 241  | 63  | 6.67E-11 | 8.68E-09 | 5 | response to reactive oxygen species       | biological_process |
| GO:0000272 | 192  | 54  | 7.95E-11 | 1.01E-08 | 6 | polysaccharide catabolic process          | biological_process |
| GO:0010467 | 3537 | 506 | 1.79E-10 | 2.21E-08 | 5 | gene expression                           | biological_process |
| GO:0005615 | 141  | 43  | 4.13E-10 | 4.96E-08 | 3 | extracellular space                       | cellular_component |
| GO:0005911 | 702  | 133 | 5.20E-10 | 6.08E-08 | 3 | cell-cell junction                        | cellular_component |
| GO:0030054 | 727  | 136 | 7.87E-10 | 8.99E-08 | 2 | cell junction                             | cellular_component |
| GO:0004857 | 161  | 46  | 1.12E-09 | 1.25E-07 | 3 | enzyme inhibitor activity                 | molecular_function |
| GO:0055044 | 694  | 130 | 1.72E-09 | 1.83E-07 | 2 | symplast                                  | cellular_component |
| GO:0009506 | 694  | 130 | 1.72E-09 | 1.83E-07 | 3 | plasmodesma                               | cellular_component |
| GO:0071944 | 3429 | 486 | 1.84E-09 | 1.91E-07 | 3 | cell periphery                            | cellular_component |
| GO:0005829 | 1354 | 221 | 2.31E-09 | 2.35E-07 | 5 | cytosol                                   | cellular_component |
| GO:0006979 | 368  | 80  | 3.24E-09 | 3.23E-07 | 4 | response to oxidative stress              | biological_process |
| GO:0000786 | 51   | 22  | 6.43E-09 | 6.27E-07 | 4 | nucleosome                                | cellular_component |
| GO:0071554 | 437  | 89  | 1.24E-08 | 1.19E-06 | 3 | cell wall organization or biogenesis      | biological_process |
| GO:0042274 | 20   | 13  | 1.49E-08 | 1.30E-06 | 5 | ribosomal small subunit biogenesis        | biological_process |

#### Top 50 dif GO enrichment-wat24:con-down

| GO ID      | All num | DEGs num | P-value  | FDR      | Level | Term                                                        | Type               |
|------------|---------|----------|----------|----------|-------|-------------------------------------------------------------|--------------------|
| GO:0001071 | 1345    | 221      | 9.30E-17 | 9.96E-14 | 2     | nucleic acid binding transcription factor activity          | molecular_function |
| GO:0005488 | 12800   | 1327     | 4.26E-08 | 4.30E-06 | 2     | binding                                                     | molecular_function |
| GO:0050896 | 5231    | 576      | 1.25E-05 | 0.000673 | 2     | response to stimulus                                        | biological_process |
| GO:0023052 | 1715    | 213      | 1.94E-05 | 0.000978 | 2     | signaling                                                   | biological_process |
| GO:0008152 | 11841   | 1199     | 0.000236 | 0.007404 | 2     | metabolic process                                           | biological_process |
| GO:0044423 | 12      | 6        | 0.000407 | 0.010967 | 2     | virion part                                                 | cellular_component |
| GO:0019012 | 13      | 6        | 0.000694 | 0.016943 | 2     | virion                                                      | cellular_component |
| GO:0003700 | 1345    | 221      | 9.30E-17 | 9.96E-14 | 3     | sequence-specific DNA binding transcription factor activity | molecular_function |
| GO:0006807 | 6258    | 736      | 5.28E-13 | 1.56E-10 | 3     | nitrogen compound metabolic process                         | biological_process |
| GO:1901363 | 9640    | 1062     | 3.60E-12 | 8.61E-10 | 3     | heterocyclic compound binding                               | molecular_function |
| GO:0097159 | 9651    | 1062     | 5.08E-12 | 1.14E-09 | 3     | organic cyclic compound binding                             | molecular_function |
| GO:0009719 | 1364    | 203      | 3.21E-11 | 5.60E-09 | 3     | response to endogenous stimulus                             | biological_process |
| GO:0042221 | 2287    | 288      | 1.55E-07 | 1.45E-05 | 3     | response to chemical stimulus                               | biological_process |
| GO:0009607 | 858     | 118      | 2.40E-05 | 0.001163 | 3     | response to biotic stimulus                                 | biological_process |
| GO:0044700 | 1710    | 210      | 4.48E-05 | 0.002069 | 3     | single organism signaling                                   | biological_process |
| GO:0071704 | 10911   | 1120     | 4.69E-05 | 0.002118 | 3     | organic substance metabolic process                         | biological_process |
| GO:0016787 | 4278    | 472      | 9.00E-05 | 0.003519 | 3     | hydrolase activity                                          | molecular_function |
| GO:0051707 | 790     | 107      | 0.000105 | 0.003911 | 3     | response to other organism                                  | biological_process |
| GO:0009628 | 1566    | 191      | 0.000147 | 0.005114 | 3     | response to abiotic stimulus                                | biological_process |
| GO:0044237 | 10081   | 1034     | 0.000182 | 0.006114 | 3     | cellular metabolic process                                  | biological_process |
| GO:0009058 | 5727    | 611      | 0.000254 | 0.00779  | 3     | biosynthetic process                                        | biological_process |
| GO:0009791 | 1125    | 141      | 0.000349 | 0.010298 | 3     | post-embryonic development                                  | biological_process |
| GO:0042754 | 5       | 4        | 0.000375 | 0.010725 | 3     | negative regulation of circadian rhythm                     | biological_process |
| GO:0003682 | 340     | 52       | 0.000401 | 0.010967 | 3     | chromatin binding                                           | molecular_function |
| GO:0019028 | 12      | 6        | 0.000407 | 0.010967 | 3     | viral capsid                                                | cellular_component |
| GO:0019222 | 2140    | 246      | 0.000665 | 0.016759 | 3     | regulation of metabolic process                             | biological_process |
| GO:0044238 | 10226   | 1039     | 0.00081  | 0.019149 | 3     | primary metabolic process                                   | biological_process |

GO:0043167 9044 924 0.001148 0.023403 3 ion binding molecular\_function

Top 50 dif GO enrichment wat24:con-down

| GO_ID      | All_num | DEGs_num | Pvalue   | FDR      | Level | Term                                                        | Type               |
|------------|---------|----------|----------|----------|-------|-------------------------------------------------------------|--------------------|
| GO:0015074 | 1125    | 201      | 2.64E-19 | 1.01E-15 | 6     | DNA integration                                             | biological_process |
| GO:0001071 | 1345    | 221      | 9.30E-17 | 9.96E-14 | 2     | nucleic acid binding transcription factor activity          | molecular_function |
| GO:0003700 | 1345    | 221      | 9.30E-17 | 9.96E-14 | 3     | sequence-specific DNA binding transcription factor activity | molecular_function |
| GO:0090304 | 4585    | 585      | 1.04E-16 | 9.96E-14 | 5     | nucleic acid metabolic process                              | biological_process |
| GO:1901360 | 5919    | 722      | 1.96E-16 | 1.50E-13 | 4     | organic cyclic compound metabolic process                   | biological_process |
| GO:0046483 | 5667    | 693      | 7.31E-16 | 4.67E-13 | 4     | heterocycle metabolic process                               | biological_process |
| GO:0006139 | 5376    | 660      | 2.56E-15 | 1.40E-12 | 4     | nucleobase-containing compound metabolic process            | biological_process |
| GO:0006725 | 5817    | 704      | 4.25E-15 | 2.03E-12 | 4     | cellular aromatic compound metabolic process                | biological_process |
| GO:0034641 | 5701    | 689      | 1.47E-14 | 6.26E-12 | 4     | cellular nitrogen compound metabolic process                | biological_process |
| GO:0006351 | 2276    | 322      | 2.07E-14 | 7.93E-12 | 6     | transcription, DNA-dependent                                | biological_process |
| GO:0032774 | 2282    | 322      | 2.96E-14 | 1.03E-11 | 6     | RNA biosynthetic process                                    | biological_process |
| GO:0003676 | 4747    | 588      | 4.02E-14 | 1.28E-11 | 4     | nucleic acid binding                                        | molecular_function |
| GO:0006807 | 6258    | 736      | 5.28E-13 | 1.56E-10 | 3     | nitrogen compound metabolic process                         | biological_process |
| GO:0018130 | 2786    | 369      | 2.52E-12 | 6.88E-10 | 5     | heterocycle biosynthetic process                            | biological_process |
| GO:1901362 | 2982    | 390      | 3.00E-12 | 7.66E-10 | 5     | organic cyclic compound biosynthetic process                | biological_process |
| GO:1901363 | 9640    | 1062     | 3.60E-12 | 8.61E-10 | 3     | heterocyclic compound binding                               | molecular_function |
| GO:0097159 | 9651    | 1062     | 5.08E-12 | 1.14E-09 | 3     | organic cyclic compound binding                             | molecular_function |
| GO:0019438 | 2870    | 375      | 1.02E-11 | 2.18E-09 | 5     | aromatic compound biosynthetic process                      | biological_process |
| GO:0070001 | 655     | 116      | 2.60E-11 | 4.98E-09 | 6     | aspartic-type peptidase activity                            | molecular_function |
| GO:0004190 | 655     | 116      | 2.60E-11 | 4.98E-09 | 7     | aspartic-type endopeptidase activity                        | molecular_function |
| GO:0034654 | 2580    | 341      | 2.80E-11 | 5.12E-09 | 5     | nucleobase-containing compound biosynthetic process         | biological_process |
| GO:0009719 | 1364    | 203      | 3.21E-11 | 5.60E-09 | 3     | response to endogenous stimulus                             | biological_process |
| GO:0044271 | 2774    | 360      | 7.20E-11 | 1.20E-08 | 5     | cellular nitrogen compound biosynthetic process             | biological_process |
| GO:0003964 | 752     | 127      | 7.77E-11 | 1.24E-08 | 7     | RNA-directed DNA polymerase activity                        | molecular_function |
| GO:0003677 | 2302    | 307      | 1.26E-10 | 1.93E-08 | 5     | DNA binding                                                 | molecular_function |
| GO:0010033 | 1584    | 226      | 1.33E-10 | 1.96E-08 | 4     | response to organic substance                               | biological_process |
| GO:0009725 | 1235    | 183      | 4.70E-10 | 6.58E-08 | 4     | response to hormone stimulus                                | biological_process |
| GO:0034061 | 789     | 129      | 4.81E-10 | 6.58E-08 | 6     | DNA polymerase activity                                     | molecular_function |
| GO:0004175 | 906     | 142      | 1.20E-09 | 1.59E-07 | 6     | endopeptidase activity                                      | molecular_function |
| GO:0000155 | 44      | 19       | 4.74E-09 | 5.51E-07 | 4     | phosphorelay sensor kinase activity                         | molecular_function |
| GO:0023014 | 44      | 19       | 4.74E-09 | 5.51E-07 | 5     | signal transduction by phosphorylation                      | biological_process |
| GO:0016775 | 44      | 19       | 4.74E-09 | 5.51E-07 | 5     | phosphotransferase activity, nitrogenous group as acceptor  | molecular_function |
| GO:0004673 | 44      | 19       | 4.74E-09 | 5.51E-07 | 6     | protein histidine kinase activity                           | molecular_function |
| GO:0016779 | 931     | 141      | 1.32E-08 | 1.48E-06 | 5     | nucleotidyltransferase activity                             | molecular_function |
| GO:0006259 | 1753    | 234      | 2.64E-08 | 2.89E-06 | 5     | DNA metabolic process                                       | biological_process |
| GO:0005034 | 11      | 9        | 2.85E-08 | 3.03E-06 | 5     | osmosensor activity                                         | molecular_function |
| GO:0004519 | 516     | 88       | 4.15E-08 | 4.30E-06 | 6     | endonuclease activity                                       | molecular_function |
| GO:0005488 | 12800   | 1327     | 4.26E-08 | 4.30E-06 | 2     | binding                                                     | molecular_function |
| GO:1901700 | 1372    | 190      | 4.47E-08 | 4.39E-06 | 4     | response to oxygen-containing compound                      | biological_process |
| GO:0046914 | 3057    | 370      | 1.49E-07 | 1.43E-05 | 6     | transition metal ion binding                                | molecular_function |
| GO:0042221 | 2287    | 288      | 1.55E-07 | 1.45E-05 | 3     | response to chemical stimulus                               | biological_process |
| GO:0009751 | 178     | 40       | 1.95E-07 | 1.78E-05 | 5     | response to salicylic acid stimulus                         | biological_process |
| GO:0008270 | 2314    | 290      | 2.17E-07 | 1.93E-05 | 7     | zinc ion binding                                            | molecular_function |
| GO:0008233 | 1200    | 167      | 2.25E-07 | 1.96E-05 | 4     | peptidase activity                                          | molecular_function |
| GO:0070011 | 1160    | 162      | 2.75E-07 | 2.34E-05 | 5     | peptidase activity, acting on L-amino acid peptides         | molecular_function |
| GO:0009733 | 367     | 66       | 2.88E-07 | 2.40E-05 | 5     | response to auxin stimulus                                  | biological_process |

|            |     |     |          |          |   |                                         |                    |
|------------|-----|-----|----------|----------|---|-----------------------------------------|--------------------|
| GO:0009755 | 768 | 116 | 3.04E-07 | 2.48E-05 | 5 | hormone-mediated signaling pathway      | biological_process |
| GO:0004518 | 604 | 95  | 5.98E-07 | 4.72E-05 | 5 | nuclease activity                       | molecular_function |
| GO:0000160 | 234 | 47  | 6.03E-07 | 4.72E-05 | 5 | phosphorelay signal transduction system | biological_process |
| GO:0009723 | 307 | 57  | 6.32E-07 | 4.84E-05 | 5 | response to ethylene stimulus           | biological_process |

#### Top 50 dif GO enrichment wat 24:wat6 up

| GO ID      | All num | DEGs num | P-value  | FDR      | Level | Term                                                        | Type               |
|------------|---------|----------|----------|----------|-------|-------------------------------------------------------------|--------------------|
| GO:0005198 | 606     | 168      | 5.63E-40 | 7.43E-37 | 2     | structural molecule activity                                | molecular_function |
| GO:0005576 | 1222    | 187      | 3.82E-12 | 1.16E-09 | 2     | extracellular region                                        | cellular_component |
| GO:0016209 | 188     | 43       | 2.35E-08 | 3.57E-06 | 2     | antioxidant activity                                        | molecular_function |
| GO:0032991 | 2491    | 306      | 1.06E-07 | 1.35E-05 | 2     | macromolecular complex                                      | cellular_component |
| GO:0001071 | 1345    | 177      | 1.16E-06 | 0.000107 | 2     | nucleic acid binding transcription factor activity          | molecular_function |
| GO:0045735 | 76      | 18       | 0.00017  | 0.008084 | 2     | nutrient reservoir activity                                 | molecular_function |
| GO:0009055 | 462     | 62       | 0.002242 | 0.06521  | 2     | electron carrier activity                                   | molecular_function |
| GO:0044699 | 7199    | 722      | 0.006214 | 0.130001 | 2     | single-organism process                                     | biological_process |
| GO:0003735 | 471     | 153      | 9.86E-46 | 1.95E-42 | 3     | structural constituent of ribosome                          | molecular_function |
| GO:0030529 | 801     | 177      | 1.59E-28 | 1.26E-25 | 3     | ribonucleoprotein complex                                   | cellular_component |
| GO:0043228 | 1628    | 273      | 3.79E-23 | 1.67E-20 | 3     | non-membrane-bounded organelle                              | cellular_component |
| GO:0004601 | 164     | 41       | 3.21E-09 | 6.34E-07 | 3     | peroxidase activity                                         | molecular_function |
| GO:0006950 | 3162    | 374      | 1.97E-07 | 2.29E-05 | 3     | response to stress                                          | biological_process |
| GO:0003700 | 1345    | 177      | 1.16E-06 | 0.000107 | 3     | sequence-specific DNA binding transcription factor activity | molecular_function |
| GO:0009056 | 1868    | 232      | 2.10E-06 | 0.000181 | 3     | catabolic process                                           | biological_process |
| GO:0042754 | 5       | 5        | 7.01E-06 | 0.000523 | 3     | negative regulation of circadian rhythm                     | biological_process |
| GO:0030312 | 671     | 96       | 1.45E-05 | 0.000986 | 3     | external encapsulating structure                            | cellular_component |
| GO:0048046 | 346     | 57       | 1.61E-05 | 0.001044 | 3     | apoplast                                                    | cellular_component |
| GO:0009628 | 1566    | 194      | 1.81E-05 | 0.001154 | 3     | response to abiotic stimulus                                | biological_process |
| GO:0071944 | 3429    | 379      | 0.000107 | 0.005373 | 3     | cell periphery                                              | cellular_component |
| GO:0016491 | 1856    | 216      | 0.000279 | 0.012272 | 3     | oxidoreductase activity                                     | molecular_function |
| GO:0045848 | 3       | 3        | 0.000809 | 0.027366 | 3     | positive regulation of nitrogen utilization                 | biological_process |
| GO:0003682 | 340     | 48       | 0.002456 | 0.069892 | 3     | chromatin binding                                           | molecular_function |
| GO:0042221 | 2287    | 251      | 0.002672 | 0.073537 | 3     | response to chemical stimulus                               | biological_process |
| GO:0051656 | 63      | 13       | 0.004806 | 0.104722 | 3     | establishment of organelle localization                     | biological_process |

#### Top 50 dif GO enrichment wat 24:wat6-up

| GO ID      | All num | DEGs num | P-value  | FDR      | Level | Term                                         | Type               |
|------------|---------|----------|----------|----------|-------|----------------------------------------------|--------------------|
| GO:0005840 | 538     | 170      | 6.32E-49 | 2.50E-45 | 4     | ribosome                                     | cellular_component |
| GO:0003735 | 471     | 153      | 9.86E-46 | 1.95E-42 | 3     | structural constituent of ribosome           | molecular_function |
| GO:0005198 | 606     | 168      | 5.63E-40 | 7.43E-37 | 2     | structural molecule activity                 | molecular_function |
| GO:0006412 | 671     | 166      | 7.43E-33 | 7.35E-30 | 6     | translation                                  | biological_process |
| GO:0030529 | 801     | 177      | 1.59E-28 | 1.26E-25 | 3     | ribonucleoprotein complex                    | cellular_component |
| GO:0044391 | 216     | 77       | 1.98E-26 | 1.31E-23 | 4     | ribosomal subunit                            | cellular_component |
| GO:0022626 | 198     | 69       | 3.67E-23 | 1.67E-20 | 5     | cytosolic ribosome                           | cellular_component |
| GO:0043228 | 1628    | 273      | 3.79E-23 | 1.67E-20 | 3     | non-membrane-bounded organelle               | cellular_component |
| GO:0043232 | 1628    | 273      | 3.79E-23 | 1.67E-20 | 4     | intracellular non-membrane-bounded organelle | cellular_component |
| GO:0044445 | 243     | 70       | 3.04E-18 | 1.20E-15 | 5     | cytosolic part                               | cellular_component |
| GO:0015934 | 125     | 42       | 5.13E-14 | 1.84E-11 | 5     | large ribosomal subunit                      | cellular_component |
| GO:0015935 | 91      | 35       | 6.47E-14 | 2.13E-11 | 5     | small ribosomal subunit                      | cellular_component |
| GO:0005576 | 1222    | 187      | 3.82E-12 | 1.16E-09 | 2     | extracellular region                         | cellular_component |
| GO:0022627 | 62      | 26       | 1.04E-11 | 2.93E-09 | 6     | cytosolic small ribosomal subunit            | cellular_component |
| GO:0022625 | 96      | 33       | 1.26E-11 | 3.33E-09 | 6     | cytosolic large ribosomal subunit            | cellular_component |

|            |      |     |          |          |   |                                                             |                    |
|------------|------|-----|----------|----------|---|-------------------------------------------------------------|--------------------|
| GO:0042542 | 164  | 42  | 9.40E-10 | 2.32E-07 | 5 | response to hydrogen peroxide                               | biological_process |
| GO:0042744 | 114  | 33  | 2.08E-09 | 4.83E-07 | 5 | hydrogen peroxide catabolic process                         | biological_process |
| GO:0070301 | 121  | 34  | 2.80E-09 | 6.15E-07 | 6 | cellular response to hydrogen peroxide                      | biological_process |
| GO:0004601 | 164  | 41  | 3.21E-09 | 6.34E-07 | 3 | peroxidase activity                                         | molecular_function |
| GO:0016684 | 164  | 41  | 3.21E-09 | 6.34E-07 | 4 | oxidoreductase activity, acting on peroxide as acceptor     | molecular_function |
| GO:0046906 | 485  | 86  | 3.93E-09 | 7.40E-07 | 4 | tetrapyrrole binding                                        | molecular_function |
| GO:0042743 | 131  | 35  | 7.03E-09 | 1.26E-06 | 5 | hydrogen peroxide metabolic process                         | biological_process |
| GO:0044267 | 2316 | 294 | 8.38E-09 | 1.44E-06 | 5 | cellular protein metabolic process                          | biological_process |
| GO:0020037 | 452  | 80  | 1.49E-08 | 2.46E-06 | 5 | heme binding                                                | molecular_function |
| GO:0034614 | 141  | 36  | 1.59E-08 | 2.51E-06 | 6 | cellular response to reactive oxygen species                | biological_process |
| GO:0016209 | 188  | 43  | 2.35E-08 | 3.57E-06 | 2 | antioxidant activity                                        | molecular_function |
| GO:0051301 | 391  | 71  | 3.33E-08 | 4.89E-06 | 4 | cell division                                               | biological_process |
| GO:0004553 | 478  | 82  | 4.14E-08 | 5.85E-06 | 5 | hydrolase activity, hydrolyzing O-glycosyl compounds        | molecular_function |
| GO:0034599 | 148  | 36  | 6.11E-08 | 8.33E-06 | 5 | cellular response to oxidative stress                       | biological_process |
| GO:0010035 | 854  | 127 | 7.09E-08 | 9.35E-06 | 4 | response to inorganic substance                             | biological_process |
| GO:0032991 | 2491 | 306 | 1.06E-07 | 1.35E-05 | 2 | macromolecular complex                                      | cellular_component |
| GO:0000302 | 241  | 49  | 1.36E-07 | 1.64E-05 | 5 | response to reactive oxygen species                         | biological_process |
| GO:0016798 | 523  | 86  | 1.37E-07 | 1.64E-05 | 4 | hydrolase activity, acting on glycosyl bonds                | molecular_function |
| GO:0006950 | 3162 | 374 | 1.97E-07 | 2.29E-05 | 3 | response to stress                                          | biological_process |
| GO:0003746 | 66   | 21  | 2.97E-07 | 3.36E-05 | 7 | translation elongation factor activity                      | molecular_function |
| GO:0072593 | 173  | 38  | 4.51E-07 | 4.96E-05 | 4 | reactive oxygen species metabolic process                   | biological_process |
| GO:0005874 | 238  | 47  | 5.91E-07 | 6.32E-05 | 4 | microtubule                                                 | cellular_component |
| GO:0009644 | 43   | 16  | 7.06E-07 | 7.35E-05 | 7 | response to high light intensity                            | biological_process |
| GO:0006979 | 368  | 64  | 7.63E-07 | 7.74E-05 | 4 | response to oxidative stress                                | biological_process |
| GO:0007018 | 130  | 31  | 7.85E-07 | 7.76E-05 | 5 | microtubule-based movement                                  | biological_process |
| GO:0000272 | 192  | 40  | 9.73E-07 | 9.39E-05 | 6 | polysaccharide catabolic process                            | biological_process |
| GO:0001071 | 1345 | 177 | 1.16E-06 | 0.000107 | 2 | nucleic acid binding transcription factor activity          | molecular_function |
| GO:0003700 | 1345 | 177 | 1.16E-06 | 0.000107 | 3 | sequence-specific DNA binding transcription factor activity | molecular_function |
| GO:0006414 | 50   | 17  | 1.40E-06 | 0.000126 | 6 | translational elongation                                    | biological_process |
| GO:0016998 | 67   | 20  | 1.76E-06 | 0.000155 | 5 | cell wall macromolecule catabolic process                   | biological_process |
| GO:0009056 | 1868 | 232 | 2.10E-06 | 0.000181 | 3 | catabolic process                                           | biological_process |
| GO:0009415 | 296  | 53  | 2.74E-06 | 0.00023  | 4 | response to water stimulus                                  | biological_process |
| GO:0042274 | 20   | 10  | 3.73E-06 | 0.000308 | 5 | ribosomal small subunit biogenesis                          | biological_process |
| GO:0009414 | 287  | 51  | 5.23E-06 | 0.000423 | 4 | response to water deprivation                               | biological_process |
| GO:0002181 | 17   | 9   | 6.35E-06 | 0.000502 | 7 | cytoplasmic translation                                     | biological_process |

#### Top 50 dif GO enrichment wat 24:wat6-down

| GO ID      | All num | DEGs num | P-value  | FDR      | Level | Term                          | Type               |
|------------|---------|----------|----------|----------|-------|-------------------------------|--------------------|
| GO:0050896 | 5231    | 312      | 3.04E-12 | 1.72E-09 | 2     | response to stimulus          | biological_process |
| GO:0005215 | 1416    | 105      | 1.15E-08 | 1.71E-06 | 2     | transporter activity          | molecular_function |
| GO:0005576 | 1222    | 85       | 4.27E-06 | 0.000201 | 2     | extracellular region          | cellular_component |
| GO:0009055 | 462     | 40       | 1.62E-05 | 0.000578 | 2     | electron carrier activity     | molecular_function |
| GO:0048511 | 143     | 17       | 0.000119 | 0.002887 | 2     | rhythmic process              | biological_process |
| GO:0045735 | 76      | 11       | 0.00034  | 0.006724 | 2     | nutrient reservoir activity   | molecular_function |
| GO:0023052 | 1715    | 100      | 0.000635 | 0.009452 | 2     | signaling                     | biological_process |
| GO:0042221 | 2287    | 182      | 1.10E-17 | 3.10E-14 | 3     | response to chemical stimulus | biological_process |
| GO:0016491 | 1856    | 156      | 3.23E-17 | 4.56E-14 | 3     | oxidoreductase activity       | molecular_function |

|            |      |     |          |          |   |                                                         |                    |
|------------|------|-----|----------|----------|---|---------------------------------------------------------|--------------------|
| GO:0009719 | 1364 | 117 | 1.41E-13 | 1.32E-10 | 3 | response to endogenous stimulus                         | biological_process |
| GO:0044710 | 3304 | 211 | 1.53E-10 | 3.61E-08 | 3 | single-organism metabolic process                       | biological_process |
| GO:0048037 | 658  | 65  | 1.99E-10 | 4.32E-08 | 3 | cofactor binding                                        | molecular_function |
| GO:0022892 | 1051 | 82  | 6.32E-08 | 8.50E-06 | 3 | substrate-specific transporter activity                 | molecular_function |
| GO:0051240 | 97   | 18  | 1.15E-07 | 1.31E-05 | 3 | positive regulation of multicellular organismal process | biological_process |
| GO:0022857 | 1145 | 86  | 1.58E-07 | 1.65E-05 | 3 | transmembrane transporter activity                      | molecular_function |
| GO:0048046 | 346  | 37  | 2.43E-07 | 2.37E-05 | 3 | apoplast                                                | cellular_component |
| GO:0051094 | 92   | 16  | 1.44E-06 | 0.000101 | 3 | positive regulation of developmental process            | biological_process |
| GO:0090484 | 128  | 18  | 7.59E-06 | 0.000335 | 3 | drug transporter activity                               | molecular_function |
| GO:0042752 | 52   | 11  | 9.05E-06 | 0.000387 | 3 | regulation of circadian rhythm                          | biological_process |
| GO:0009628 | 1566 | 100 | 2.23E-05 | 0.000725 | 3 | response to abiotic stimulus                            | biological_process |
| GO:0031224 | 4742 | 250 | 4.82E-05 | 0.001375 | 3 | intrinsic to membrane                                   | cellular_component |
| GO:0044765 | 1550 | 96  | 0.000103 | 0.002562 | 3 | single-organism transport                               | biological_process |
| GO:0070469 | 113  | 14  | 0.0003   | 0.006372 | 3 | respiratory chain                                       | cellular_component |
| GO:0051050 | 32   | 7   | 0.000317 | 0.006626 | 3 | positive regulation of transport                        | biological_process |
| GO:0042445 | 114  | 14  | 0.000329 | 0.006724 | 3 | hormone metabolic process                               | biological_process |
| GO:0007623 | 116  | 14  | 0.000394 | 0.007521 | 3 | circadian rhythm                                        | biological_process |
| GO:0006950 | 3162 | 170 | 0.000458 | 0.00856  | 3 | response to stress                                      | biological_process |

#### Top 50 dif GOs enrichment wat 24:wat6 down

| GO ID      | All num | DEGs num | P-value  | FDR      | Level | Term                                                                                   | Type               |
|------------|---------|----------|----------|----------|-------|----------------------------------------------------------------------------------------|--------------------|
| GO:0042221 | 2287    | 182      | 1.10E-17 | 3.10E-14 | 3     | response to chemical stimulus                                                          | biological_process |
| GO:0016491 | 1856    | 156      | 3.23E-17 | 4.56E-14 | 3     | oxidoreductase activity                                                                | molecular_function |
| GO:0009719 | 1364    | 117      | 1.41E-13 | 1.32E-10 | 3     | response to endogenous stimulus                                                        | biological_process |
| GO:0009733 | 367     | 50       | 2.78E-13 | 1.97E-10 | 5     | response to auxin stimulus                                                             | biological_process |
| GO:0050896 | 5231    | 312      | 3.04E-12 | 1.72E-09 | 2     | response to stimulus                                                                   | biological_process |
| GO:0009725 | 1235    | 105      | 5.05E-12 | 2.38E-09 | 4     | response to hormone stimulus                                                           | biological_process |
| GO:0010033 | 1584    | 125      | 6.44E-12 | 2.60E-09 | 4     | response to organic substance                                                          | biological_process |
| GO:0080167 | 105     | 24       | 9.33E-12 | 3.30E-09 | 4     | response to karrikin                                                                   | biological_process |
| GO:0010378 | 9       | 8        | 8.68E-11 | 2.57E-08 | 4     | temperature compensation of the circadian clock                                        | biological_process |
| GO:0071365 | 247     | 36       | 9.11E-11 | 2.57E-08 | 6     | cellular response to auxin stimulus                                                    | biological_process |
| GO:0009734 | 238     | 35       | 1.29E-10 | 3.32E-08 | 6     | auxin mediated signaling pathway                                                       | biological_process |
| GO:0044710 | 3304    | 211      | 1.53E-10 | 3.61E-08 | 3     | single-organism metabolic process                                                      | biological_process |
| GO:0048037 | 658     | 65       | 1.99E-10 | 4.32E-08 | 3     | cofactor binding                                                                       | molecular_function |
| GO:0015291 | 349     | 43       | 3.49E-10 | 7.03E-08 | 5     | secondary active transmembrane transporter activity                                    | molecular_function |
| GO:0005506 | 489     | 53       | 3.77E-10 | 7.10E-08 | 7     | iron ion binding                                                                       | molecular_function |
| GO:0016638 | 48      | 15       | 6.62E-10 | 1.17E-07 | 4     | oxidoreductase activity, acting on the CH-NH2 group of donors                          | molecular_function |
| GO:0048578 | 13      | 8        | 1.07E-08 | 1.67E-06 | 4     | positive regulation of long-day photoperiodism, flowering                              | biological_process |
| GO:0016639 | 13      | 8        | 1.07E-08 | 1.67E-06 | 5     | oxidoreductase activity, acting on the CH-NH2 group of donors, NAD or NADP as acceptor | molecular_function |
| GO:0005215 | 1416    | 105      | 1.15E-08 | 1.71E-06 | 2     | transporter activity                                                                   | molecular_function |
| GO:0009755 | 768     | 66       | 3.91E-08 | 5.52E-06 | 5     | hormone-mediated signaling pathway                                                     | biological_process |
| GO:0022892 | 1051    | 82       | 6.32E-08 | 8.50E-06 | 3     | substrate-specific transporter activity                                                | molecular_function |
| GO:0022891 | 932     | 75       | 6.94E-08 | 8.91E-06 | 4     | substrate-specific transmembrane transporter activity                                  | molecular_function |
| GO:0020037 | 452     | 45       | 1.03E-07 | 1.27E-05 | 5     | heme binding                                                                           | molecular_function |

|            |      |    |          |          |   |                                                                                                       |                    |
|------------|------|----|----------|----------|---|-------------------------------------------------------------------------------------------------------|--------------------|
| GO:0051240 | 97   | 18 | 1.15E-07 | 1.31E-05 | 3 | positive regulation of multicellular organismal process                                               | biological_process |
| GO:0071495 | 842  | 69 | 1.20E-07 | 1.31E-05 | 4 | cellular response to endogenous stimulus                                                              | biological_process |
| GO:0046906 | 485  | 47 | 1.21E-07 | 1.31E-05 | 4 | tetrapyrrole binding                                                                                  | molecular_function |
| GO:0022857 | 1145 | 86 | 1.58E-07 | 1.65E-05 | 3 | transmembrane transporter activity                                                                    | molecular_function |
| GO:0032870 | 816  | 67 | 1.71E-07 | 1.73E-05 | 5 | cellular response to hormone stimulus                                                                 | biological_process |
| GO:0048046 | 346  | 37 | 2.43E-07 | 2.37E-05 | 3 | apoplast                                                                                              | cellular_component |
| GO:0016705 | 487  | 46 | 3.45E-07 | 3.25E-05 | 4 | oxidoreductase activity, acting on paired donors, with incorporation or reduction of molecular oxygen | molecular_function |
| GO:0050662 | 473  | 45 | 3.78E-07 | 3.45E-05 | 4 | coenzyme binding                                                                                      | molecular_function |
| GO:0022904 | 56   | 13 | 4.49E-07 | 3.96E-05 | 6 | respiratory electron transport chain                                                                  | biological_process |
| GO:0043436 | 1141 | 84 | 5.12E-07 | 4.39E-05 | 5 | oxoacid metabolic process                                                                             | biological_process |
| GO:0006082 | 1147 | 84 | 6.35E-07 | 5.28E-05 | 4 | organic acid metabolic process                                                                        | biological_process |
| GO:0070887 | 1169 | 85 | 7.29E-07 | 5.79E-05 | 4 | cellular response to chemical stimulus                                                                | biological_process |
| GO:1901700 | 1372 | 96 | 7.52E-07 | 5.79E-05 | 4 | response to oxygen-containing compound                                                                | biological_process |
| GO:0045181 | 6    | 5  | 7.79E-07 | 5.79E-05 | 6 | glutamate synthase activity, NAD(P)H as acceptor                                                      | molecular_function |
| GO:0016040 | 6    | 5  | 7.79E-07 | 5.79E-05 | 7 | glutamate synthase (NADH) activity                                                                    | molecular_function |
| GO:0050660 | 161  | 22 | 1.25E-06 | 9.09E-05 | 5 | flavin adenine dinucleotide binding                                                                   | molecular_function |
| GO:0051094 | 92   | 16 | 1.44E-06 | 0.000101 | 3 | positive regulation of developmental process                                                          | biological_process |
| GO:0043449 | 36   | 10 | 1.64E-06 | 0.000103 | 4 | cellular alkene metabolic process                                                                     | biological_process |
| GO:0009692 | 36   | 10 | 1.64E-06 | 0.000103 | 5 | ethylene metabolic process                                                                            | biological_process |
| GO:0043450 | 36   | 10 | 1.64E-06 | 0.000103 | 5 | alkene biosynthetic process                                                                           | biological_process |
| GO:1900674 | 36   | 10 | 1.64E-06 | 0.000103 | 5 | olefin biosynthetic process                                                                           | biological_process |
| GO:0009693 | 36   | 10 | 1.64E-06 | 0.000103 | 6 | ethylene biosynthetic process                                                                         | biological_process |
| GO:0010035 | 854  | 66 | 1.79E-06 | 0.00011  | 4 | response to inorganic substance                                                                       | biological_process |
| GO:0048586 | 22   | 8  | 1.88E-06 | 0.000111 | 5 | regulation of long-day photoperiodism, flowering                                                      | biological_process |
| GO:0048582 | 63   | 13 | 1.89E-06 | 0.000111 | 4 | positive regulation of post-embryonic development                                                     | biological_process |
| GO:0002705 | 7    | 5  | 2.63E-06 | 0.000138 | 5 | positive regulation of leukocyte mediated immunity                                                    | biological_process |
| GO:0002821 | 7    | 5  | 2.63E-06 | 0.000138 | 5 | positive regulation of adaptive immune response                                                       | biological_process |
