# Supplementary material for: De Novo Characterization of the Mung Bean Transcriptome and Transcriptomic Analysis of Adventitious Rooting in Seedlings Using RNA-Seq
Source: PubMed Central journal article supplement (PMC4503682; doi:10.1371/journal.pone.0132969), 2015-07-15
Supplement: pone.0132969.s009.pdf [file pone.0132969.s009.pdf]

S5 Table. Top list of significant KOs

## wat6:con-down

| KO ID   | All num | DEGs num | P-value  | FDR    | Description                                 |
|---------|---------|----------|----------|--------|---------------------------------------------|
| ko00195 | 53      | 20       | 1.51E-06 | 0.0004 | Photosynthesis                              |
| ko00710 | 46      | 15       | 0.0002   | 0.0149 | Carbon fixation in photosynthetic organisms |
| ko00906 | 20      | 9        | 0.0003   | 0.0149 | Carotenoid biosynthesis                     |
| ko00910 | 31      | 10       | 0.0027   | 0.1250 | Nitrogen metabolism                         |
| ko00600 | 34      | 10       | 0.0057   | 0.1740 | Sphingolipid metabolism                     |
| ko00561 | 52      | 13       | 0.0078   | 0.1867 | Glycerolipid metabolism                     |
| ko00860 | 58      | 14       | 0.0082   | 0.1867 | Porphyrin and chlorophyll metabolism        |
| ko04712 | 23      | 7        | 0.0162   | 0.2524 | Circadian rhythm - plant                    |
| ko00053 | 35      | 9        | 0.0210   | 0.2942 | Ascorbate and aldarate metabolism           |
| ko04744 | 11      | 4        | 0.0355   | 0.3684 | Phototransduction                           |
| ko02010 | 42      | 9        | 0.0618   | 0.5110 | ABC transporters                            |
| ko04075 | 130     | 21       | 0.1043   | 0.7124 | Plant hormone signal transduction           |

## wat6:con-up

| KO ID   | All num | DEGs num | P-value  | FDR      | Description                                   |
|---------|---------|----------|----------|----------|-----------------------------------------------|
| ko03010 | 337     | 110      | 4.42E-29 | 1.02E-26 | Ribosome                                      |
| ko00940 | 69      | 25       | 2.66E-08 | 3.07E-06 | Phenylpropanoid biosynthesis                  |
| ko00360 | 57      | 21       | 2.55E-07 | 1.96E-05 | Phenylalanine metabolism                      |
| ko00980 | 40      | 13       | 0.0002   | 0.0078   | Metabolism of xenobiotics by cytochrome P450  |
| ko00909 | 7       | 5        | 0.0003   | 0.0078   | Sesquiterpenoid and triterpenoid biosynthesis |
| ko00480 | 63      | 17       | 0.0003   | 0.0078   | Glutathione metabolism                        |
| ko04610 | 18      | 8        | 0.0003   | 0.0078   | Complement and coagulation cascades           |
| ko00270 | 68      | 17       | 0.0009   | 0.0181   | Cysteine and methionine metabolism            |
| ko00260 | 52      | 14       | 0.0011   | 0.0216   | Glycine                                       |
| ko00750 | 10      | 5        | 0.0025   | 0.0451   | Vitamin B6 metabolism                         |
| ko00920 | 29      | 9        | 0.0030   | 0.0496   | Sulfur metabolism                             |
| ko01230 | 180     | 32       | 0.0040   | 0.0610   | Biosynthesis of amino acids                   |

## wat24:con-up

| KO_ID   | All_num | DEGs_num | Pvalue    | FDR       | Description                                   |
|---------|---------|----------|-----------|-----------|-----------------------------------------------|
| ko03010 | 337     | 212      | 5.34E-115 | 1.46E-112 | Ribosome                                      |
| ko00940 | 69      | 34       | 1.92E-13  | 2.63E-11  | Phenylpropanoid biosynthesis                  |
| ko00360 | 57      | 27       | 2.00E-10  | 1.82E-08  | Phenylalanine metabolism                      |
| ko00909 | 7       | 5        | 0.0006    | 0.0276    | Sesquiterpenoid and triterpenoid biosynthesis |
| ko04110 | 94      | 21       | 0.0077    | 0.2684    | Cell cycle                                    |
| ko00040 | 49      | 13       | 0.0078    | 0.2684    | Pentose and glucuronate interconversions      |
| ko00945 | 26      | 8        | 0.0140    | 0.4267    | Stilbenoid                                    |
| ko00941 | 17      | 6        | 0.0162    | 0.4442    | Flavonoid biosynthesis                        |
| ko04610 | 18      | 6        | 0.0217    | 0.5410    | Complement and coagulation cascades           |
| ko00980 | 40      | 10       | 0.0280    | 0.6097    | Metabolism of xenobiotics by cytochrome P450  |

## wat24:con-down

| KO_ID   | All_num | DEGs_num | Pvalue   | FDR    | Description |
|---------|---------|----------|----------|--------|-------------|
| ko00073 | 12      | 8        | 1.40E-06 | 0.0002 | Cutin       |

|         |     |    |          |        |                                        |
|---------|-----|----|----------|--------|----------------------------------------|
| ko00904 | 8   | 6  | 1.20E-05 | 0.0011 | Diterpenoid biosynthesis               |
| ko04060 | 58  | 15 | 0.0001   | 0.0081 | Cytokine-cytokine receptor interaction |
| ko04712 | 23  | 7  | 0.0031   | 0.1194 | Circadian rhythm - plant               |
| ko04744 | 11  | 4  | 0.0126   | 0.3408 | Phototransduction                      |
| ko04075 | 130 | 19 | 0.0217   | 0.4567 | Plant hormone signal transduction      |
| ko04062 | 36  | 7  | 0.0377   | 0.5445 | Chemokine signaling pathway            |
| ko04020 | 59  | 9  | 0.0776   | 0.7337 | Calcium signaling pathway              |
| ko00053 | 35  | 6  | 0.0879   | 0.7337 | Ascorbate and aldarate metabolism      |
| ko04210 | 27  | 5  | 0.0883   | 0.7337 | Apoptosis                              |
| ko00906 | 20  | 4  | 0.0978   | 0.7337 | Carotenoid biosynthesis                |

#### wat24:wat6-up

| KO_ID   | All_num | DEGs_num | Pvalue   | FDR      | Description                                  |
|---------|---------|----------|----------|----------|----------------------------------------------|
| ko03010 | 337     | 117      | 5.20E-43 | 1.32E-40 | Ribosome                                     |
| ko00940 | 69      | 21       | 3.96E-07 | 5.03E-05 | Phenylpropanoid biosynthesis                 |
| ko00360 | 57      | 15       | 0.0001   | 0.0077   | Phenylalanine metabolism                     |
| ko04110 | 94      | 20       | 0.0002   | 0.0122   | Cell cycle                                   |
| ko00052 | 38      | 11       | 0.0004   | 0.0170   | Galactose metabolism                         |
| ko00500 | 119     | 19       | 0.0108   | 0.3036   | Starch and sucrose metabolism                |
| ko00710 | 46      | 8        | 0.0541   | 0.9999   | Carbon fixation in photosynthetic organisms  |
| ko00980 | 40      | 7        | 0.0674   | 0.9999   | Metabolism of xenobiotics by cytochrome P450 |
| ko00040 | 49      | 8        | 0.0738   | 0.9999   | Pentose and glucuronate interconversions     |
| ko02010 | 42      | 7        | 0.0835   | 0.9999   | ABC transporters                             |
| ko04626 | 77      | 11       | 0.0891   | 0.9999   | Plant-pathogen interaction                   |
| ko04141 | 145     | 17       | 0.1693   | 0.9999   | Protein processing in endoplasmic reticulum  |
| ko00195 | 53      | 7        | 0.20610  | 0.9999   | Photosynthesis                               |

#### wat24:wat6-down

| KO ID   | All num | DEGs num | P-value | FDR    | Description                        |
|---------|---------|----------|---------|--------|------------------------------------|
| ko00190 | 143     | 16       | 0.0003  | 0.0293 | Oxidative phosphorylation          |
| ko00910 | 31      | 6        | 0.0017  | 0.0753 | Nitrogen metabolism                |
| ko04075 | 130     | 13       | 0.0033  | 0.1095 | Plant hormone signal transduction  |
| ko00904 | 8       | 3        | 0.0036  | 0.1095 | Diterpenoid biosynthesis           |
| ko00195 | 53      | 7        | 0.0067  | 0.1720 | Photosynthesis                     |
| ko00270 | 68      | 8        | 0.0077  | 0.1743 | Cysteine and methionine metabolism |
| ko04712 | 23      | 4        | 0.0149  | 0.3003 | Circadian rhythm - plant           |
| ko00940 | 69      | 7        | 0.0263  | 0.4102 | Phenylpropanoid biosynthesis       |
| ko00920 | 29      | 4        | 0.0329  | 0.4257 | Sulfur metabolism                  |
| ko00360 | 57      | 6        | 0.0329  | 0.4257 | Phenylalanine metabolism           |
| ko00908 | 11      | 2        | 0.0770  | 0.5809 | Zeatin biosynthesis                |
| ko00380 | 26      | 3        | 0.0964  | 0.6036 | Tryptophan metabolism              |
| ko00480 | 63      | 5        | 0.1288  | 0.6277 | Glutathione metabolism             |
