# Supplementary material for: De Novo Characterization of the Mung Bean Transcriptome and Transcriptomic Analysis of Adventitious Rooting in Seedlings Using RNA-Seq
Source: PubMed Central journal article supplement (PMC4503682; doi:10.1371/journal.pone.0132969), 2015-07-15
Supplement: pone.0132969.s010.pdf [file pone.0132969.s010.pdf]

S6 Table. Top list of significant DEGs in the three samples

## Top 50 DGEs con:wat6-up

| Gene_ID         | Reads1 | RPKM1 | Reads2 | RPKM2 | Log2   | Pvalue  | FDR     | NR ref         | Description                                                       |
|-----------------|--------|-------|--------|-------|--------|---------|---------|----------------|-------------------------------------------------------------------|
| Vr39448_c0_seq1 | 0      | 0.00  | 973    | 53.6  | NA     | 0       | 0       | XP_004500339.1 | cationic peroxidase 1-like [Cicer arietinum]                      |
| Vr44006_c0_seq1 | 0      | 0.00  | 489    | 9.79  | NA     | 0       | 0       | BAJ22384.1     | terminal flower 1a [Vigna unguiculata]                            |
| Vr58732_c0_seq1 | 0      | 0.00  | 370    | 6.08  | NA     | 0       | 0       | XP_003551178.1 | cationic peroxidase 1-like [Glycine max]                          |
| Vr69119_c0_seq1 | 0      | 0.00  | 335    | 5.16  | NA     | 0       | 0       | XP_003520006.1 | probable pectinesterase 29-like [Glycine max]                     |
| Vr43029_c0_seq1 | 0      | 0.00  | 197    | 6.19  | NA     | 0       | 0       | XP_003529031.1 | patatin group A-3-like [Glycine max]                              |
| Vr37067_c0_seq4 | 0      | 0.00  | 128    | 1.2   | NA     | 0       | 0       | XP_003548678.1 | G-type lectin S-receptor-like serine/threonine-protein kinase     |
| Vr35851_c0_seq1 | 825    | 11.60 | 43774  | 752   | -6.02  | 0       | 0       | NP_001237786.1 | Kunitz trypsin protease inhibitor precursor [Glycine max]         |
| Vr38231_c0_seq1 | 1125   | 17.01 | 29772  | 550   | -5.02  | 0       | 0       | NP_001235010.1 | uncharacterized protein LOC100500484 precursor [Glycine max]      |
| Vr35207_c0_seq2 | 668    | 7.68  | 18340  | 258   | -5.07  | 1.6E-11 | 1.1E-10 | XP_003537598.1 | isoflavone reductase-like [Glycine max]                           |
| Vr38993_c0_seq1 | 509    | 3.90  | 15083  | 141   | -5.18  | 9.5E-12 | 6.4E-11 | NP_001240000.1 | isoflavone 2'-hydroxylase-like [Glycine max]                      |
| Vr31128_c0_seq2 | 366    | 4.20  | 12075  | 169   | -5.33  | 4.7E-12 | 3.3E-11 | XP_003547616.1 | cationic peroxidase 2-like [Glycine max]                          |
| Vr39039_c0_seq1 | 52     | 0.82  | 10890  | 210   | -8.00  | 6.2E-14 | 4.9E-13 | ADX66343.1     | pathogenesis-related protein [Glycine max]                        |
| Vr36526_c0_seq1 | 174.5  | 6.49  | 10690  | 486   | -6.23  | 5.8E-13 | 4.4E-12 | ABS70717.1     | pathogen-related protein [Vigna angularis]                        |
| Vr40472_c0_seq1 | 109    | 1.22  | 7732   | 106   | -6.44  | 0       | 0       | CAA61279.1     | basic chitinase class 3 [Vigna unguiculata]                       |
| Vr22610_c0_seq1 | 13     | 0.19  | 7681   | 140   | -9.50  | 0       | 0       | XP_003544327.1 | cationic peroxidase 1-like [Glycine max]                          |
| Vr39180_c0_seq1 | 2      | 0.04  | 6952   | 155   | -12.05 | 1.6E-15 | 1.3E-14 | XP_003538325.1 | cationic peroxidase 1-like [Glycine max]                          |
| Vr34333_c0_seq1 | 170    | 2.00  | 6546   | 94.3  | -5.56  | 6.2E-13 | 4.7E-12 | NP_001236116.1 | uncharacterized protein LOC100500048 precursor [Glycine max]      |
| Vr39339_c0_seq1 | 227    | 2.28  | 6519   | 80.2  | -5.13  | 7.2E-13 | 5.4E-12 | NP_001236520.1 | vestitone reductase [Glycine max]                                 |
| Vr35930_c0_seq1 | 165    | 2.51  | 6102   | 114   | -5.50  | 7.6E-13 | 5.7E-12 | NP_001236934.1 | uncharacterized protein LOC100500621 precursor [Glycine max]      |
| Vr39225_c0_seq1 | 133    | 2.02  | 5616   | 104   | -5.69  | 6.4E-13 | 4.9E-12 | XP_003534655.1 | cationic peroxidase 1-like [Glycine max]                          |
| Vr36176_c0_seq1 | 95     | 0.90  | 5444   | 63.3  | -6.13  | 0       | 0       | XP_003529158.1 | leucoanthocyanidin dioxygenase-like [Glycine max]                 |
| Vr39450_c0_seq1 | 136    | 2.21  | 5138   | 102   | -5.53  | 6.9E-13 | 5.2E-12 | XP_003533952.1 | 21 kDa protein-like [Glycine max]                                 |
| Vr13687_c0_seq1 | 77     | 0.47  | 4326   | 32.1  | -6.10  | 0       | 0       | XP_003531311.1 | low affinity cationic amino acid transporter 2-like [Glycine max] |
| Vr42500_c0_seq1 | 156    | 1.32  | 4293   | 44.5  | -5.07  | 1.3E-12 | 9.8E-12 | XP_003547675.1 | lysine histidine transporter 1-like [Glycine max]                 |
| Vr41972_c0_seq1 | 93     | 1.04  | 3151   | 43.1  | -5.37  | 0       | 0       | XP_003536550.1 | thiazole biosynthetic enzyme, chloroplastic-like [Glycine max]    |
| Vr42108_c0_seq1 | 6      | 0.11  | 3129   | 69.2  | -9.32  | 0       | 0       | NP_001238339.1 | uncharacterized protein LOC100527589 [Glycine max]                |
| Vr41271_c0_seq1 | 66     | 0.83  | 2487   | 38.4  | -5.53  | 0       | 0       | ACM89628.1     | TIR-NBS-LRR type disease resistance protein [Glycine max]         |
| Vr41725_c0_seq1 | 45     | 0.59  | 1929   | 31    | -5.71  | 6.3E-14 | 5E-13   | NP_001241518.1 | uncharacterized protein LOC100788713 [Glycine max]                |
| Vr36323_c0_seq1 | 35     | 0.31  | 1573   | 17    | -5.78  | 4.5E-14 | 3.6E-13 | XP_003552581.1 | anthocyanin 5-aromatic acyltransferase-like [Glycine max]         |
| Vr49784_c0_seq1 | 18     | 0.33  | 1553   | 35.1  | -6.72  | 1.3E-14 | 1.1E-13 | XP_003543377.1 | cysteine-rich repeat secretory protein 38 [Glycine max]           |

|                 |      |       |       |      |        |         |         |                |                                                                         |
|-----------------|------|-------|-------|------|--------|---------|---------|----------------|-------------------------------------------------------------------------|
| Vr31555_c0_seq1 | 48   | 0.38  | 1542  | 14.9 | -5.30  | 9.5E-14 | 7.5E-13 | XP_003521608.1 | sex determination protein tasselseed-2-like [Glycine max]               |
| Vr13838_c0_seq1 | 11   | 0.08  | 1386  | 12.5 | -7.27  | 0       | 0       | XP_003518665.1 | polygalacturonase At1g48100-like [Glycine max]                          |
| Vr41762_c0_seq1 | 1    | 0.01  | 1370  | 16.4 | -10.71 | 2.2E-16 | 2E-15   | XP_003556683.1 | polygalacturonase-like [Glycine max]                                    |
| Vr50416_c0_seq1 | 12   | 0.10  | 1313  | 13.3 | -7.06  | 0       | 0       | XP_003548705.1 | D-inositol-3-phosphate glycosyltransferase-like [Glycine max]           |
| Vr46027_c0_seq1 | 6    | 0.11  | 1094  | 24.4 | -7.80  | 0       | 0       | NP_001235010.1 | uncharacterized protein LOC100500484 precursor [Glycine max]            |
| Vr21159_c0_seq1 | 28   | 0.32  | 1088  | 15.1 | -5.57  | 5.9E-14 | 4.7E-13 | ABN08535.1     | Auxin Efflux Carrier [Medicago truncatula]                              |
| Vr28474_c0_seq3 | 32   | 0.21  | 1074  | 8.72 | -5.36  | 4.9E-14 | 3.9E-13 | XP_003543367.1 | equilibrative nucleoside transporter 3-like [Glycine max]               |
| Vr49226_c0_seq1 | 3    | 0.03  | 1028  | 11.5 | -8.71  | 0       | 0       | XP_003525322.1 | cytochrome P450 716B2-like [Glycine max]                                |
| Vr46582_c0_seq1 | 8    | 0.14  | 941   | 19.4 | -7.17  | 0       | 0       | NP_001241331.1 | uncharacterized protein LOC100811719 precursor [Glycine max]            |
| Vr34208_c0_seq1 | 9    | 0.23  | 889.5 | 27.4 | -6.92  | 1.1E-15 | 9.6E-15 | XP_003537598.1 | isoflavone reductase-like [Glycine max]                                 |
| Vr39778_c0_seq1 | 19   | 0.93  | 802   | 47.8 | -5.69  | 1.8E-14 | 1.5E-13 | XP_003552297.1 | cationic peroxidase 1-like [Glycine max]                                |
| Vr35894_c0_seq1 | 18   | 0.15  | 699   | 7.02 | -5.57  | 1.3E-14 | 1.1E-13 | XP_003520743.1 | probable pectinesterase/pectinesterase inhibitor 7-like [Glycine max]   |
| Vr53527_c0_seq1 | 17   | 0.21  | 658   | 9.91 | -5.56  | 5.6E-15 | 4.7E-14 | XP_003538484.1 | abscisic acid receptor PYL6-like [Glycine max]                          |
| Vr48273_c0_seq1 | 2.5  | 0.07  | 624   | 21.5 | -8.25  | 1.6E-15 | 1.3E-14 | BAA92940.1     | yieldin precursor [Vigna unguiculata]                                   |
| Vr45385_c0_seq1 | 14   | 0.11  | 617   | 5.71 | -5.75  | 0       | 0       | BAA19161.1     | 1-aminocyclopropane-1-carboxylate synthase [Vigna radiata var. radiata] |
| Vr45777_c0_seq1 | 22   | 0.31  | 609   | 10.4 | -5.08  | 3.4E-14 | 2.7E-13 | XP_003548263.1 | 4,5-DOPA dioxygenase extradiol-like protein-like [Glycine max]          |
| Vr45152_c0_seq1 | 22   | 0.39  | 607   | 13.1 | -5.08  | 3.4E-14 | 2.7E-13 | XP_003527180.1 | blue copper protein-like [Glycine max]                                  |
| Vr44274_c0_seq1 | 12   | 0.58  | 605   | 35.6 | -5.95  | 0       | 0       | AAM12529.1     | chalcone reductase [Pueraria montana var. lobata]                       |
| Vr50284_c0_seq1 | 4    | 0.05  | 534   | 8.41 | -7.35  | 2.2E-16 | 2E-15   | XP_003524361.1 | expansin-like B1-like [Glycine max]                                     |
| Vr59439_c0_seq1 | 2    | 0.02  | 522   | 6.85 | -8.32  | 1.6E-15 | 1.3E-14 | XP_003546286.1 | reticuline oxidase-like protein-like [Glycine max]                      |
| Vr34971_c0_seq1 | 6195 | 96.16 | 1E+05 | 2679 | -4.80  | 2.8E-10 | 1.6E-09 | XP_003548287.1 | trypsin inhibitor A-like [Glycine max]                                  |
| Vr38156_c0_seq1 | 4981 | 36.71 | 91843 | 827  | -4.49  | 3E-11   | 1.9E-10 | ACC77194.1     | isoflavone synthase 1 [Vigna unguiculata]                               |
| Vr36280_c0_seq2 | 4779 | 38.56 | 83481 | 823  | -4.42  | 0       | 0       | XP_003539343.1 | anthocyanin 3'-O-beta-glucosyltransferase-like [Glycine max]            |

## Top 50 DGEs con:wat6-down

| Gene_ID          | Reads1<br>-con | RPKM1 | Reads2<br>-wat6 | RPKM2 | Log2 | Pvalue   | FDR      | NR references  | description                                                     |
|------------------|----------------|-------|-----------------|-------|------|----------|----------|----------------|-----------------------------------------------------------------|
| Vr22942_c0_seq1  | 209            | 2.20  | 0               | 0.00  | NA   | 6.05E-55 | 9.57E-54 | XP_003520521.1 | polygalacturonase-like [Glycine max]                            |
| Vr175308_c0_seq1 | 197            | 7.32  | 0               | 0.00  | NA   | 7.89E-52 | 1.22E-50 | XP_003526623.1 | auxin-induced protein 5NG4-like [Glycine max]                   |
| Vr108548_c0_seq1 | 176            | 11.43 | 0               | 0.00  | NA   | 2.23E-46 | 3.27E-45 | ABG56534.1     | polyprotein precursor [Bean common mosaic virus]                |
| Vr123225_c0_seq1 | 167            | 11.23 | 0               | 0.00  | NA   | 8.81E-44 | 1.25E-42 | AGS41513.1     | HC-Pro, partial [Bean common mosaic virus strain peanut stripe] |
| Vr754819_c0_seq1 | 107            | 1.17  | 0               | 0.00  | NA   | 1.83E-28 | 2.11E-27 | XP_003548659.1 | transcription factor bHLH91-like [Glycine max]                  |

|                  |        |         |      |       |       |          |          |                |                                                                    |
|------------------|--------|---------|------|-------|-------|----------|----------|----------------|--------------------------------------------------------------------|
| Vr30105_c0_seq1  | 103    | 6.01    | 0    | 0.00  | NA    | 2E-27    | 2.25E-26 | XP_003541676.1 | serine carboxypeptidase-like 12-like [Glycine max]                 |
| Vr39799_c0_seq1  | 21964  | 249.38  | 377  | 5.23  | 5.57  | 0        | 0        | ABH02878.1     | MYB transcription factor MYB134 [Glycine max]                      |
| Vr41217_c0_seq1  | 16245  | 142.63  | 474  | 5.09  | 4.81  | 0        | 0        | ACJ61246.1     | serine glyoxylate aminotransferase 2 [Glycine max]                 |
| Vr40489_c0_seq1  | 13321  | 223.86  | 200  | 4.11  | 5.77  | 0        | 0        | NP_001236400.1 | MYB transcription factor MYB114 [Glycine max]                      |
| Vr38043_c0_seq1  | 12585  | 19.59   | 8    | 0.02  | 10.33 | 0        | 0        | ACE95704.1     | polyprotein precursor [Bean common mosaic virus]                   |
| Vr15096_c0_seq1  | 10976  | 70.99   | 364  | 2.88  | 4.62  | 0        | 0        | XP_003544189.1 | probable E3 ubiquitin-protein ligase HERC1-like [Glycine max]      |
| Vr33063_c0_seq2  | 8706   | 28.73   | 270  | 1.09  | 4.72  | 0        | 0        | XP_004512150.1 | histidine kinase 1-like isoform X2 [Cicer arietinum]               |
| Vr40796_c0_seq1  | 5243   | 57.69   | 153  | 2.06  | 4.81  |          | 0        | XP_003549537.1 | heat shock 70 kDa protein-like [Glycine max]                       |
| Vr50534_c0_seq1  | 4847   | 28.21   | 226  | 1.61  | 4.13  | 0        | 0        | XP_003519092.1 | ABC transporter G family member 22-like [Glycine max]              |
| Vr13836_c0_seq2  | 4622   | 75.72   | 84   | 1.68  | 5.49  | 0        | 0        | ABH02918.1     | MYB transcription factor MYB114 [Glycine max]                      |
| Vr48206_c0_seq1  | 3644   | 65.60   | 153  | 3.37  | 4.28  | 0        | 0        | XP_003523924.1 | auxin-induced protein 5NG4-like [Glycine max]                      |
| Vr55469_c0_seq1  | 3578   | 27.63   | 74   | 0.70  | 5.31  | 0        | 0        | XP_003537193.1 | auxin-induced protein 5NG4-like isoform 1 [Glycine max]            |
| Vr56588_c0_seq1  | 2173   | 16.46   | 72   | 0.67  | 4.63  | 0        | 0        | AAO83155.1     | putative organic cation transport protein [Phaseolus vulgaris]     |
| Vr55489_c0_seq1  | 2101   | 23.85   | 97   | 1.35  | 4.15  | 0        | 0        | XP_003529644.1 | S-type anion channel SLAH1-like [Glycine max]                      |
| Vr24590_c0_seq1  | 2030   | 13.88   | 28   | 0.23  | 5.89  | 0        | 0        | XP_003535586.1 | S-type anion channel SLAH3-like [Glycine max]                      |
| Vr28255_c0_seq1  | 1388   | 11.09   | 39   | 0.38  | 4.86  | 4.8E-298 | 1.6E-296 | XP_003539445.1 | lysosomal Pro-X carboxypeptidase-like [Glycine max]                |
| Vr14132_c0_seq1  | 1308   | 14.39   | 59   | 0.79  | 4.18  | 2.3E-256 | 7.2E-255 | XP_002304053.1 | predicted protein [Populus trichocarpa]                            |
| Vr42894_c0_seq1  | 1211   | 19.88   | 48   | 0.96  | 4.37  | 2.2E-244 | 6.9E-243 | XP_003549537.1 | heat shock 70 kDa protein-like [Glycine max]                       |
| Vr54849_c0_seq1  | 902    | 18.45   | 36   | 0.90  | 4.36  | 3.6E-182 | 9.8E-181 | XP_003523141.1 | calcium-binding protein CML38-like [Glycine max]                   |
| Vr37145_c0_seq1  | 808    | 7.32    | 24   | 0.27  | 4.78  | 1.3E-172 | 3.5E-171 | NP_001236165.1 | cytochrome P450 71D10 [Glycine max]                                |
| Vr27182_c0_seq1  | 806    | 6.18    | 21   | 0.20  | 4.97  | 9.6E-176 | 2.6E-174 | XP_003529007.1 | protein WAX2-like [Glycine max]                                    |
| Vr112545_c0_seq1 | 753    | 12.39   | 14   | 0.28  | 5.46  | 1.3E-171 | 3.4E-170 | XP_003529396.1 | ethylene-responsive transcription factor ERF109-like [Glycine max] |
| Vr35442_c0_seq1  | 730    | 16.72   | 14   | 0.39  | 5.41  | 7.8E-166 | 2.1E-164 | AAF81194.1     | LEA-18 [Phaseolus vulgaris]                                        |
| Vr50845_c0_seq1  | 726    | 16.18   | 15   | 0.41  | 5.31  | 1.8E-163 | 4.6E-162 | XP_003531926.1 | 3-ketoacyl-CoA synthase 6-like [Glycine max]                       |
| Vr77281_c0_seq1  | 709    | 19.03   | 26   | 0.85  | 4.48  | 5.2E-146 | 1.3E-144 | XP_003538774.1 | nitrate transporter 1.5-like [Glycine max]                         |
| Vr51893_c0_seq1  | 694    | 19.39   | 25   | 0.85  | 4.51  | 1.9E-143 | 4.7E-142 | ACZ51240.1     | 3-ketoacyl-CoA synthase [Arachis hypogaea]                         |
| Vr71314_c0_seq1  | 673    | 13.19   | 25   | 0.60  | 4.46  | 2.5E-138 | 6.2E-137 | XP_003538534.1 | cysteine proteinase inhibitor 2 [Glycine max]                      |
| Vr46055_c0_seq1  | 672    | 8.55    | 31   | 0.48  | 4.15  | 8.3E-132 | 2E-130   | XP_003538574.1 | small heat shock protein, chloroplastic-like [Glycine max]         |
| Vr22084_c0_seq1  | 645    | 8.78    | 4    | 0.07  | 7.04  | 1.2E-159 | 3.1E-158 | XP_003516973.1 | UPF0098 protein MTH_273-like [Glycine max]                         |
| Vr15106_c0_seq1  | 602    | 15.34   | 30   | 0.93  | 4.04  | 4.9E-116 | 1.1E-114 | NP_001241449.1 | uncharacterized protein LOC100775900 [Glycine max]                 |
| Vr72294_c0_seq1  | 529    | 11.23   | 15   | 0.39  | 4.85  | 2.3E-114 | 5.2E-113 | XP_003538774.1 | nitrate transporter 1.5-like [Glycine max]                         |
| Vr10403_c0_seq1  | 506    | 8.13    | 25   | 0.49  | 4.05  | 5.5E-98  | 1.15E-96 | XP_003522798.1 | sugar transport protein 5-like [Glycine max]                       |
| Vr32314_c0_seq1  | 146470 | 1096.47 | 9745 | 89.17 | 3.62  | 0        | 0        | CAX94843.1     | myo-inositol 1-phosphate synthase [Phaseolus vulgaris]             |

|                 |       |        |      |       |      |   |   |                |                                                                    |
|-----------------|-------|--------|------|-------|------|---|---|----------------|--------------------------------------------------------------------|
| Vr28874_c0_seq9 | 73259 | 300.52 | 3932 | 19.72 | 3.93 | 0 | 0 | XP_003528756.1 | protein LHY [Glycine max]                                          |
| Vr39139_c0_seq1 | 45984 | 283.81 | 3680 | 27.76 | 3.35 | 0 | 0 | XP_003523384.1 | subtilisin-like protease-like [Glycine max]                        |
| Vr14424_c0_seq1 | 15783 | 88.89  | 1373 | 9.45  | 3.23 | 0 | 0 | XP_003549515.1 | protein WAX2-like [Glycine max]                                    |
| Vr13806_c0_seq1 | 11403 | 74.71  | 1115 | 8.93  | 3.06 | 0 | 0 | XP_003548314.1 | uncharacterized protein LOC778089 [Glycine max]                    |
| Vr39861_c0_seq1 | 10124 | 242.94 | 1026 | 30.09 | 3.01 | 0 | 0 | XP_003541070.1 | 21 kDa protein-like [Glycine max]                                  |
| Vr43985_c0_seq1 | 9228  | 76.96  | 904  | 9.22  | 3.06 | 0 | 0 | XP_003549204.1 | putative nuclease HARBII-like [Glycine max]                        |
| Vr43431_c0_seq1 | 8805  | 72.74  | 825  | 8.33  | 3.13 | 0 | 0 | NP_001238594.1 | syringolide-induced protein 13-1-1 [Glycine max]                   |
| Vr36823_c0_seq4 | 7049  | 41.46  | 702  | 5.05  | 3.04 | 0 | 0 | XP_004492929.1 | subtilisin-like protease-like isoform X1 [Cicer arietinum]         |
| Vr29009_c0_seq6 | 6073  | 56.56  | 464  | 5.28  | 3.42 | 0 | 0 | XP_003540767.1 | uncharacterized protein LOC100797817 [Glycine max]                 |
| Vr38900_c0_seq1 | 5313  | 99.19  | 417  | 9.51  | 3.38 | 0 | 0 | XP_003542731.1 | 18.5 kDa class I heat shock protein-like [Glycine max]             |
| Vr32665_c0_seq2 | 5083  | 25.15  | 293  | 1.77  | 3.83 | 0 | 0 | XP_003519894.1 | phosphate transporter PHO1-like [Glycine max]                      |
| Vr36885_c0_seq1 | 4234  | 37.79  | 317  | 3.46  | 3.45 | 0 | 0 | XP_003548043.1 | isoflavone 2'-hydroxylase-like [Glycine max]                       |
| Vr47011_c0_seq1 | 4080  | 40.82  | 363  | 4.44  | 3.20 | 0 | 0 | XP_003524651.1 | transcription factor HEC1-like [Glycine max]                       |
| Vr50091_c0_seq1 | 3891  | 55.39  | 304  | 5.29  | 3.39 | 0 | 0 | XP_003533795.1 | ethylene-responsive transcription factor ERF017-like [Glycine max] |
| Vr22806_c0_seq1 | 3879  | 36.92  | 334  | 3.89  | 3.25 | 0 | 0 | XP_003534929.1 | putative nuclease HARBII-like [Glycine max]                        |
| Vr44946_c0_seq1 | 3251  | 32.73  | 328  | 4.04  | 3.02 | 0 | 0 | XP_003544508.1 | homeobox-leucine zipper protein HOX19-like [Glycine max]           |
| Vr17354_c0_seq1 | 2317  | 22.31  | 232  | 2.73  | 3.03 | 0 | 0 | XP_003545292.1 | phytoene synthase, chloroplastic-like [Glycine max]                |

## Top 50 DGEs wat24:wat6-Down

| Gene_ID         | Reads1-<br>wat6 | Reads   |             |       | Log2 | P-value  | FDR      | NR             |                                                                         |
|-----------------|-----------------|---------|-------------|-------|------|----------|----------|----------------|-------------------------------------------------------------------------|
|                 |                 | RPKM1   | 2-wat<br>24 | RPKM2 |      |          |          |                |                                                                         |
| Vr41972_c0_seq1 | 3151            | 43.11   | 10          | 0.14  | 8.30 | 0        | 0        | XP_003536550.1 | thiazole biosynthetic enzyme, chloroplastic-like [Glycine max]          |
| Vr13298_c0_seq1 | 2934            | 61.12   | 83          | 1.73  | 5.14 | 0        | 0        | XP_003594345.1 | hypothetical protein MTR_2g027550 [Medicago truncatula]                 |
| Vr49846_c0_seq1 | 2439            | 19.96   | 74          | 0.61  | 5.04 | 0        | 0        | NP_001235886.1 | circadian clock-associated FKF1 [Glycine max]                           |
| Vr34247_c0_seq1 | 1056            | 23.76   | 30          | 0.68  | 5.14 | 5.3E-269 | 1.7E-267 | NP_001239781.1 | uncharacterized protein LOC100782877 [Glycine max]                      |
| Vr45385_c0_seq1 | 617             | 5.71    | 6           | 0.06  | 6.68 | 2.8E-174 | 8.5E-173 | BAA19161.1     | 1-aminocyclopropane-1-carboxylate synthase [Vigna radiata var. radiata] |
| Vr21502_c0_seq1 | 561             | 9.02    | 6           | 0.10  | 6.55 | 1.1E-157 | 3.4E-156 | XP_003536475.1 | uncharacterized protein LOC100792832 [Glycine max]                      |
| Vr13406_c0_seq1 | 101800          | 1268.32 | 4898        | 61.06 | 4.38 | 0        | 0        | ACZ74696.1     | formate dehydrogenase [Phaseolus vulgaris]                              |
| Vr22757_c0_seq3 | 11699           | 187.39  | 620         | 9.94  | 4.24 | 0        | 0        | NP_001235540.1 | uncharacterized protein LOC100305960 [Glycine max]                      |
| Vr38378_c0_seq1 | 9249            | 205.20  | 375         | 8.33  | 4.62 | 0        | 0        | AAAY51975.1    | GIR1 [Vigna radiata]                                                    |
| Vr40132_c0_seq1 | 7291            | 157.37  | 334         | 7.21  | 4.45 | 0        | 0        | XP_003551324.1 | uncharacterized protein LOC100811254 [Glycine max]                      |
| Vr41355_c0_seq1 | 6670            | 66.93   | 302         | 3.03  | 4.46 | 0        | 0        | XP_003547247.1 | beta-glucosidase 47-like [Glycine max]                                  |

|                 |       |        |      |       |      |          |          |                |                                                                                   |
|-----------------|-------|--------|------|-------|------|----------|----------|----------------|-----------------------------------------------------------------------------------|
| Vr32306_c0_seq1 | 3766  | 51.45  | 160  | 2.19  | 4.56 | 0        | 0        | NP_001242314.1 | uncharacterized protein LOC100820588 [Glycine max]                                |
| Vr45510_c0_seq1 | 1515  | 18.91  | 54   | 0.67  | 4.81 | 0        | 0        | XP_003521784.1 | GDSL esterase/lipase At5g33370-like [Glycine max]                                 |
| Vr42551_c0_seq1 | 1050  | 20.68  | 33   | 0.65  | 4.99 | 1.4E-263 | 4.4E-262 | NP_001238664.1 | uncharacterized protein LOC100500218 [Glycine max]                                |
| Vr67595_c0_seq1 | 868   | 6.95   | 52   | 0.42  | 4.06 | 6.2E-192 | 1.9E-190 | XP_003526280.1 | probable L-type lectin-domain containing receptor kinase VII.2-like [Glycine max] |
| Vr53207_c0_seq1 | 843   | 21.33  | 50   | 1.27  | 4.07 | 6.2E-187 | 1.9E-185 | XP_003546144.1 | 15.4 kDa class V heat shock protein-like [Glycine max]                            |
| Vr10963_c0_seq2 | 696   | 7.86   | 40   | 0.45  | 4.12 | 7.6E-156 | 2.2E-154 | XP_003531287.1 | UDP-glycosyltransferase 74F1-like [Glycine max]                                   |
| Vr20800_c0_seq2 | 519   | 8.79   | 30   | 0.51  | 4.11 | 1.8E-116 | 5.3E-115 | XP_003548408.1 | uncharacterized protein LOC100791528 [Glycine max]                                |
| Vr34550_c0_seq2 | 29551 | 394.94 | 2952 | 39.48 | 3.32 | 0        | 0        | AAW27915.1     | xyloglucan endotransglucosylase/hydrolase precursor [Vigna radiata]               |
| Vr23172_c0_seq1 | 21227 | 223.54 | 1912 | 20.15 | 3.47 | 0        | 0        | XP_003518844.1 | benzyl alcohol O-benzoyltransferase-like [Glycine max]                            |
| Vr37396_c0_seq1 | 18259 | 190.19 | 1665 | 17.35 | 3.45 | 0        | 0        | XP_003520588.1 | LOW QUALITY PROTEIN: cytochrome P450 94A1-like [Glycine max]                      |
| Vr36176_c0_seq1 | 5444  | 63.33  | 478  | 5.56  | 3.51 | 0        | 0        | XP_003529158.1 | leucoanthocyanidin dioxygenase-like [Glycine max]                                 |
| Vr42461_c0_seq1 | 5259  | 73.63  | 531  | 7.44  | 3.31 | 0        | 0        | XP_003546057.1 | GDSL esterase/lipase At1g29670-like [Glycine max]                                 |
| Vr22359_c0_seq1 | 4255  | 50.17  | 404  | 4.77  | 3.40 | 0        | 0        | XP_003531568.1 | auxin-induced protein 5NG4-like [Glycine max]                                     |
| Vr36822_c0_seq1 | 3653  | 40.93  | 426  | 4.78  | 3.10 | 0        | 0        | AAA87182.1     | auxin-induced protein [Vigna radiata]                                             |
| Vr22565_c0_seq2 | 3414  | 22.05  | 423  | 2.73  | 3.01 | 0        | 0        | ACU23356.1     | unknown [Glycine max]                                                             |
| Vr44347_c0_seq1 | 2886  | 40.20  | 301  | 4.20  | 3.26 | 0        | 0        | XP_003520449.1 | leucoanthocyanidin dioxygenase-like [Glycine max]                                 |
| Vr40851_c0_seq1 | 2437  | 85.99  | 206  | 7.27  | 3.56 | 0        | 0        | XP_003522964.1 | uncharacterized protein LOC100500383 [Glycine max]                                |
| Vr46260_c0_seq1 | 2070  | 28.75  | 201  | 2.79  | 3.36 | 0        | 0        | XP_003534534.1 | 7-methylxanthosine synthase 1-like [Glycine max]                                  |
| Vr42547_c0_seq1 | 1939  | 80.97  | 170  | 7.10  | 3.51 | 0        | 0        | AAK18751.1     | patatin-like protein [Vigna unguiculata]                                          |
| Vr45762_c0_seq1 | 1747  | 28.34  | 214  | 3.47  | 3.03 | 1E-298   | 3.3E-297 | NP_001240893.1 | uncharacterized protein LOC100790141 [Glycine max]                                |
| Vr52177_c0_seq1 | 1700  | 24.63  | 125  | 1.81  | 3.76 | 0        | 0        | NP_001248360.1 | expansin-B3-like precursor [Glycine max]                                          |
| Vr41278_c0_seq1 | 1682  | 83.99  | 119  | 5.95  | 3.82 | 0        | 0        | NP_001237144.1 | uncharacterized protein LOC100305819 precursor [Glycine max]                      |
| Vr39198_c0_seq1 | 1659  | 43.77  | 181  | 4.78  | 3.20 | 6.3E-299 | 2E-297   | O24541.1       | Auxin-induced protein 22C; Aux22c [Vigna radiata]                                 |
| Vr47043_c0_seq1 | 1597  | 39.72  | 106  | 2.64  | 3.91 | 0        | 0        | XP_003537630.1 | auxin-induced protein 15A-like [Glycine max]                                      |
| Vr40704_c0_seq1 | 1571  | 64.61  | 160  | 6.58  | 3.29 | 2.3E-291 | 7.4E-290 | AAK18751.1     | patatin-like protein [Vigna unguiculata]                                          |
| Vr39142_c0_seq1 | 1254  | 45.41  | 136  | 4.94  | 3.20 | 9.9E-227 | 3.1E-225 | O24541.1       | Auxin-induced protein 22C; AltName: Aux22c [Vigna radiata]                        |
| Vr30665_c0_seq1 | 1211  | 15.24  | 128  | 1.61  | 3.24 | 1.2E-221 | 3.7E-220 | XP_003518070.1 | uncharacterized protein LOC100809248 [Glycine max]                                |
| Vr42706_c0_seq1 | 1131  | 17.64  | 81   | 1.26  | 3.80 | 1.5E-237 | 4.7E-236 | XP_004494855.1 | uncharacterized protein LOC101493620 [Cicer arietinum]                            |
| Vr46027_c0_seq1 | 1094  | 24.41  | 80   | 1.79  | 3.77 | 2.1E-228 | 6.5E-227 | NP_001235010.1 | uncharacterized protein LOC100500484 precursor [Glycine max]                      |
| Vr20019_c0_seq1 | 1082  | 7.32   | 72   | 0.49  | 3.91 | 3.3E-232 | 1E-230   | XP_003528000.1 | two-Vronent response regulator-like PRR95-like [Glycine max]                      |

|                 |       |        |       |        |      |          |          |                |                                                                                            |
|-----------------|-------|--------|-------|--------|------|----------|----------|----------------|--------------------------------------------------------------------------------------------|
| Vr37789_c0_seq1 | 981   | 21.08  | 86    | 1.85   | 3.51 | 3.2E-193 | 9.9E-192 | XP_003534344.1 | auxin-induced protein 10A5-like [Glycine max]                                              |
| Vr34208_c0_seq1 | 890   | 27.39  | 92    | 2.84   | 3.27 | 1.3E-164 | 3.9E-163 | XP_003537598.1 | isoflavone reductase-like [Glycine max]                                                    |
| Vr51018_c0_seq1 | 862   | 17.80  | 100   | 2.07   | 3.11 | 4.4E-152 | 1.3E-150 | XP_003528935.1 | uncharacterized protein LOC100795735 [Glycine max]                                         |
| Vr36836_c0_seq3 | 829   | 19.60  | 82    | 1.95   | 3.33 | 2.1E-156 | 6.3E-155 | XP_003533487.1 | auxin-induced protein X10A-like [Glycine max]                                              |
| Vr22989_c0_seq1 | 730   | 8.35   | 75    | 0.86   | 3.28 | 7E-136   | 2E-134   | XP_003517852.1 | UDP-glycosyltransferase 74B1-like [Glycine max]                                            |
| Vr37739_c0_seq2 | 714   | 15.46  | 86    | 1.86   | 3.05 | 3.9E-124 | 1.1E-122 | AD117229.1     | hypothetical protein [uncultured alpha proteobacterium HF0070_14E07]                       |
| Vr57190_c0_seq1 | 697   | 9.94   | 52    | 0.74   | 3.74 | 2.9E-145 | 8.5E-144 | XP_003544885.1 | uncharacterized protein LOC100793086 [Glycine max]                                         |
| Vr22629_c0_seq1 | 658   | 12.22  | 64    | 1.19   | 3.36 | 2.6E-125 | 7.5E-124 | XP_003530613.1 | uncharacterized protein LOC100500563 [Glycine max]<br>gb ACU15678.1  unknown [Glycine max] |
| Vr33294_c0_seq1 | 573   | 11.63  | 59    | 1.20   | 3.28 | 6.3E-107 | 1.7E-105 | XP_003535935.1 | calvin cycle protein CP12-like [Glycine max]                                               |
| Vr44933_c0_seq1 | 513   | 10.01  | 40    | 0.78   | 3.68 | 6.8E-106 | 1.9E-104 | XP_003542633.1 | auxin-responsive protein IAA12-like [Glycine max]                                          |
| Vr34844_c1_seq1 | 61856 | 154.98 | 14781 | 37.06  | 2.06 | 0        | 0        | XP_003637074.1 | Cell wall-associated hydrolase, partial [Medicago truncatula]                              |
| Vr38305_c0_seq1 | 32326 | 597.89 | 7981  | 147.71 | 2.02 | 0        | 0        | P14298.2       | Chalcone--flavone isomerase; [Phaseolus vulgaris]                                          |
| Vr38333_c0_seq1 | 31984 | 537.03 | 4339  | 72.90  | 2.88 | 0        | 0        | XP_003539812.1 | uncharacterized protein At5g22580-like [Glycine max]                                       |
| Vr38231_c0_seq1 | 29772 | 550.12 | 5015  | 92.73  | 2.57 | 0        | 0        | NP_001235010.1 | uncharacterized protein LOC100500484 precursor [Glycine max]                               |
| Vr38502_c0_seq1 | 21672 | 302.31 | 4920  | 68.68  | 2.14 | 0        | 0        | XP_003549741.1 | uncharacterized protein LOC100801982 [Glycine max]                                         |

## Top 50 DGEs Wat24:Wat6-Up

| Gene_ID         | Reads |       | Reads2-<br>wat24 | RPKM2 | Log2  | P-value  | FDR      | NR             | Description                                                        |
|-----------------|-------|-------|------------------|-------|-------|----------|----------|----------------|--------------------------------------------------------------------|
|                 | 1-wat | RPKM1 |                  |       |       |          |          |                |                                                                    |
| Vr68124_c0_seq1 | 0     | 0.00  | 988              | 22.01 | NA    | 0        | 0        | P0DI41.1       | VIGUN Casparian strip membrane protein 3                           |
| Vr68249_c0_seq1 | 0     | 0.00  | 705              | 18.66 | NA    | 0        | 0        | AFK36631.1     | unknown [Medicago truncatula]                                      |
| Vr41572_c0_seq1 | 0     | 0.00  | 438              | 5.81  | NA    | 0        | 0        | XP_003554607.1 | auxin-induced protein 5NG4-like [Glycine max]                      |
| Vr51177_c0_seq1 | 0     | 0.00  | 244              | 4.99  | NA    | 0        | 0        | XP_003528524.1 | auxin-binding protein ABP19a-like [Glycine max]                    |
| Vr19710_c0_seq1 | 0     | 0.00  | 205              | 3.07  | NA    | 0        | 0        | CBJ28620.1     | Ribosomal protein L3 [Ectocarpus siliculosus]                      |
| Vr36832_c0_seq1 | 0     | 0.00  | 188              | 3.01  | NA    | 0        | 0        | CBJ31444.1     | Cathepsin L-like proteinase [Ectocarpus siliculosus]               |
| Vr17981_c0_seq1 | 0     | 0.00  | 177              | 4.02  | NA    | 0        | 0        | NP_001236648.1 | CASP-like protein 1 [Glycine max]                                  |
| Vr118414_c0_seq | 0     | 0.00  | 175              | 2.90  | NA    | 0        | 0        | XP_003528650.1 | ethylene-responsive transcription factor ERF086-like [Glycine max] |
| Vr404398_c0_seq | 0     | 0.00  | 141              | 2.81  | NA    | 0        | 0        | NP_001239790.1 | uncharacterized protein LOC100778526 precursor [Glycine max]       |
| Vr44673_c0_seq1 | 15    | 0.28  | 3255             | 61.19 | -7.76 | 2.66E-15 | 4.34E-14 | XP_003539771.1 | vignain-like [Glycine max]                                         |
| Vr22850_c0_seq1 | 14    | 0.16  | 2822             | 32.99 | -7.66 | 0        | 0        | NP_001241330.1 | uncharacterized protein LOC100808391 [Glycine max]                 |
| Vr34411_c0_seq1 | 20    | 0.21  | 2782             | 28.56 | -7.12 | 2.35E-14 | 3.69E-13 | XP_003521576.1 | endoglucanase 17-like [Glycine max]                                |

|                 |      |       |       |        |       |          |          |                |                                                                                                                                                     |
|-----------------|------|-------|-------|--------|-------|----------|----------|----------------|-----------------------------------------------------------------------------------------------------------------------------------------------------|
| Vr35020_c0_seq1 | 7    | 0.11  | 1955  | 31.52  | -8.13 | 0        | 0        | XP_003539707.1 | uncharacterized protein LOC100784571 [Glycine max]                                                                                                  |
| Vr59584_c0_seq1 | 7    | 0.12  | 1296  | 21.83  | -7.53 | 0        | 0        | XP_003543376.1 | early nodulin-like protein 1-like [Glycine max]                                                                                                     |
| Vr36698_c0_seq1 | 4    | 0.09  | 1294  | 29.64  | -8.34 | 0        | 0        | P0DI40.1       | VIGUNCasparian strip membrane protein 2                                                                                                             |
| Vr22476_c0_seq1 | 15   | 0.16  | 1023  | 10.96  | -6.09 | 2.66E-15 | 4.34E-14 | XP_003556105.1 | low-temperature-induced 65 kDa protein-like [Glycine max]                                                                                           |
| Vr35419_c0_seq1 | 20   | 0.26  | 972   | 12.57  | -5.60 | 2.35E-14 | 3.69E-13 | AAU94657.      | ef1a [Stramenopile sp. ex Nuclearia delicatula CCAP1552/1]                                                                                          |
| Vr58105_c0_seq1 | 2    | 0.04  | 951   | 16.99  | -8.89 | 0        | 0        | XP_003555719.1 | uncharacterized protein LOC100810925 [Glycine max]                                                                                                  |
| Vr35442_c0_seq1 | 14   | 0.39  | 868   | 24.32  | -5.96 | 0        | 0        | AAF81194.1     | LEA-18 [Phaseolus vulgaris]                                                                                                                         |
| Vr100707_c0_seq | 4    | 0.02  | 511   | 2.29   | -7.00 | 0        | 0        | XP_003524132.1 | LRR receptor-like serine/threonine-protein kinase GSO1-like [Glycine max]                                                                           |
| Vr22680_c0_seq1 | 1892 | 23.45 | 34863 | 432.38 | -4.20 | 0        | 0        | XP_003529031.1 | patatin group A-3-like [Glycine max]                                                                                                                |
| Vr39095_c0_seq1 | 1149 | 14.01 | 25010 | 305.24 | -4.44 | 0        | 0        | XP_003554078.1 | metacaspase-9-like [Glycine max]                                                                                                                    |
| Vr39799_c0_seq1 | 377  | 5.23  | 8130  | 112.91 | -4.43 | 7.58E-12 | 9.08E-11 | ABH02878.1     | MYB transcription factor MYB134 [Glycine max]                                                                                                       |
| Vr15096_c0_seq1 | 364  | 2.88  | 6605  | 52.25  | -4.18 | 7.32E-12 | 8.83E-11 | XP_003544189.1 | probable E3 ubiquitin-protein ligase HERC1-like [Glycine max]                                                                                       |
| Vr43029_c0_seq1 | 197  | 6.19  | 5100  | 160.26 | -4.70 | 2.64E-13 | 3.86E-12 | XP_003529031.1 | patatin group A-3-like [Glycine max]                                                                                                                |
| Vr23696_c0_seq1 | 243  | 1.69  | 4951  | 34.48  | -4.35 | 1.6E-12  | 2.11E-11 | XP_003547234.1 | uncharacterized protein LOC100782145 [Glycine max]                                                                                                  |
| Vr40489_c0_seq1 | 200  | 4.11  | 4616  | 94.88  | -4.53 | 6.08E-13 | 8.64E-12 | NP_001236400.1 | MYB transcription factor MYB114 [Glycine max] gb ABW87009.1  late elongated hypocotyl and circadian clock associated-1-like protein 2 [Glycine max] |
| Vr40796_c0_seq1 | 153  | 2.06  | 4450  | 59.89  | -4.86 | 8.39E-13 | 1.16E-11 | XP_003549537.1 | heat shock 70 kDa protein-like [Glycine max]                                                                                                        |
| Vr24999_c1_seq1 | 90   | 2.05  | 2396  | 54.52  | -4.74 | 0        | 0        | XP_003534948.1 | protein LURP-one-related 6-like [Glycine max]                                                                                                       |
| Vr53159_c0_seq1 | 90   | 0.80  | 1914  | 16.95  | -4.41 | 0        | 0        | XP_003539873.1 | isocitrate lyase 2-like [Glycine max]                                                                                                               |
| Vr42894_c0_seq1 | 48   | 0.96  | 1432  | 28.76  | -4.90 | 6.73E-14 | 1.01E-12 | XP_003549537.1 | heat shock 70 kDa protein-like [Glycine max]                                                                                                        |
| Vr13836_c0_seq2 | 84   | 1.68  | 1369  | 27.43  | -4.03 | 0        | 0        | ABH02918.1     | MYB transcription factor MYB114 [Glycine max]                                                                                                       |
| Vr51789_c0_seq1 | 65   | 1.11  | 1125  | 19.15  | -4.11 | 0        | 0        | XP_003540338.1 | protein THYLAKOID FORMATION1, chloroplastic-like [Glycine max]                                                                                      |
| Vr24590_c0_seq1 | 28   | 0.23  | 512   | 4.28   | -4.19 | 5.37E-14 | 8.15E-13 | XP_003535586.1 | S-type anion channel SLAH3-like [Glycine max]                                                                                                       |
| Vr38255_c0_seq1 | 9577 | 64.00 | 85379 | 570.89 | -3.16 | 0        | 0        | AAA92063.1     | cysteinyI endopeptidase [Vigna radiata]                                                                                                             |
| Vr38664_c0_seq1 | 3003 | 43.67 | 31249 | 454.75 | -3.38 | 1.01E-10 | 9.98E-10 | XP_003540200.1 | serine carboxypeptidase-like 48-like [Glycine max]                                                                                                  |
| Vr36096_c0_seq1 | 2660 | 24.31 | 29102 | 266.09 | -3.45 | 0        | 0        | XP_003544396.1 | galactose oxidase-like [Glycine max]                                                                                                                |
| Vr36446_c0_seq1 | 1372 | 7.64  | 15451 | 86.10  | -3.49 | 0        | 0        | XP_003516513.1 | subtilisin-like protease-like [Glycine max]                                                                                                         |
| Vr14990_c0_seq1 | 1128 | 8.55  | 15322 | 116.17 | -3.76 | 0        | 0        | XP_003555206.1 | hippocampus abundant transcript 1 protein-like [Glycine max]                                                                                        |
| Vr39702_c0_seq1 | 1066 | 14.00 | 14742 | 193.76 | -3.79 | 0        | 0        | XP_003519813.1 | auxin-induced protein 5NG4-like [Glycine max]                                                                                                       |
| Vr34889_c0_seq1 | 1143 | 19.33 | 13312 | 225.24 | -3.54 | 0        | 0        | P29024.1       | Acidic endochitinase; Flags: Precursor                                                                                                              |
| Vr13808_c0_seq1 | 579  | 8.82  | 8271  | 126.02 | -3.84 | 1.81E-11 | 2E-10    | NP_001235325.1 | endonuclease [Glycine max]                                                                                                                          |
| Vr34289_c0_seq2 | 698  | 11.61 | 7644  | 127.20 | -3.45 | 3.47E-12 | 4.4E-11  | XP_002523505.1 | apolipoprotein d, putative [Ricinus communis]                                                                                                       |

|                 |     |       |      |        |       |          |          |                |                                                                      |
|-----------------|-----|-------|------|--------|-------|----------|----------|----------------|----------------------------------------------------------------------|
| Vr41941_c0_seq1 | 591 | 6.27  | 4983 | 52.92  | -3.08 | 1.82E-11 | 2E-10    | XP_003533818.1 | CBL-interacting serine/threonine-protein kinase 1-like [Glycine max] |
| Vr41217_c0_seq1 | 474 | 5.09  | 4775 | 51.28  | -3.33 | 1.02E-11 | 1.18E-10 | ACJ61246.1     | serine glyoxylate aminotransferase 2 [Glycine max]                   |
| Vr35961_c0_seq6 | 295 | 1.18  | 4115 | 16.47  | -3.80 | 2.32E-12 | 2.99E-11 | XP_003527521.1 | probable nucleoredoxin 2-like isoform 2 [Glycine max]                |
| Vr38900_c0_seq1 | 417 | 9.51  | 4064 | 92.80  | -3.29 | 7.17E-12 | 8.68E-11 | XP_003542731.1 | 18.5 kDa class I heat shock protein-like [Glycine max]               |
| Vr39642_c0_seq1 | 446 | 17.81 | 3633 | 145.14 | -3.03 | 9.97E-12 | 1.15E-10 | XP_003540200.1 | serine carboxypeptidase-like 48-like [Glycine max]                   |
| Vr13830_c0_seq1 | 324 | 3.62  | 3295 | 36.83  | -3.35 | 4.18E-12 | 5.26E-11 | XP_003547855.1 | probable calcium-binding protein CML16-like [Glycine max]            |
| Vr13152_c0_seq1 | 256 | 3.14  | 3028 | 37.17  | -3.57 | 2.32E-12 | 2.98E-11 | XP_003535208.1 | thaumatin-like protein 1a-like [Glycine max]                         |
| Vr46251_c0_seq1 | 266 | 2.62  | 2892 | 28.53  | -3.44 | 1.68E-12 | 2.21E-11 | XP_003517028.1 | pectinesterase 2-like [Glycine max]                                  |
| Vr40741_c0_seq1 | 305 | 3.90  | 2650 | 33.94  | -3.12 | 4.1E-12  | 5.16E-11 | XP_003526939.1 | bidirectional sugar transporter SWEET12-like [Glycine max]           |
| Vr35212_c0_seq3 | 191 | 1.28  | 2487 | 16.73  | -3.70 | 4.11E-13 | 5.94E-12 | XP_003552931.1 | laccase-3-like [Glycine max]                                         |
| Vr46167_c0_seq1 | 165 | 2.05  | 2086 | 25.96  | -3.66 | 5.3E-13  | 7.57E-12 | XP_003541076.1 | UPF0496 protein At4g34320-like [Glycine max]                         |
| Vr13168_c0_seq1 | 131 | 2.33  | 2065 | 36.83  | -3.98 | 1.08E-12 | 1.48E-11 | BAB33036.1     | CPRD49 [Vigna unguiculata]                                           |
| Vr44076_c0_seq1 | 161 | 2.35  | 1710 | 24.96  | -3.41 | 9.11E-13 | 1.26E-11 | XP_003546306.1 | desiccation-related protein PCC13-62-like [Glycine max]              |

### Top 50 DGEs Con :Wat24 -Up

| Gene_ID          | Reads1 | RPKM1 | Reads2 | RPKM2   | Log2 | P-value | FDR     | NR             | Description                                                                                       |
|------------------|--------|-------|--------|---------|------|---------|---------|----------------|---------------------------------------------------------------------------------------------------|
| Vr43029_c0_seq1  | 0      | 0     | 5100   | 160.26  | NA   | 4.4E-16 | 4.4E-15 | XP_003529031.1 | patatin group A-3-like [Glycine max]                                                              |
| Vr39448_c0_seq1  | 0      | 0     | 4245   | 234.11  | NA   | 4.4E-16 | 4.4E-15 | XP_004500339.1 | cationic peroxidase 1-like [Cicer arietinum]                                                      |
| Vr39419_c0_seq1  | 0      | 0     | 3670   | 79.1797 | NA   | 4.4E-16 | 4.4E-15 | ACU24511.1     | unknown [Glycine max]                                                                             |
| Vr44006_c0_seq1  | 0      | 0     | 2547   | 51.0384 | NA   | 4.4E-16 | 4.4E-15 | BAJ22384.1     | terminal flower 1a [Vigna unguiculata]                                                            |
| Vr58791_c0_seq1  | 0      | 0     | 1221   | 15.6191 | NA   | 4.4E-16 | 4.4E-15 | XP_003529031.1 | patatin group A-3-like [Glycine max]                                                              |
| Vr58732_c0_seq1  | 0      | 0     | 787    | 12.9499 | NA   | 4.4E-16 | 4.4E-15 | XP_003551178.1 | cationic peroxidase 1-like [Glycine max]                                                          |
| Vr114032_c0_seq1 | 0      | 0     | 711    | 14.8541 | NA   | 4.4E-16 | 4.4E-15 | gb ACG69488.1  | germin-like protein 12 [Glycine max]                                                              |
| Vr65533_c0_seq1  | 0      | 0     | 536    | 7.87212 | NA   | 4.4E-16 | 4.4E-15 | XP_003518150.1 | ethylene-responsive transcription factor LEP-like [Glycine max]                                   |
| Vr145400_c0_seq1 | 0      | 0     | 420    | 9.2919  | NA   | 4.4E-16 | 4.4E-15 | ABP52096.1     | phosphate transporter [Phaseolus vulgaris]                                                        |
| Vr69119_c0_seq1  | 0      | 0     | 254    | 3.91682 | NA   | 4.4E-16 | 4.4E-15 | XP_003520006.1 | probable pectinesterase 29-like [Glycine max]                                                     |
| Vr51177_c0_seq1  | 0      | 0     | 244    | 4.99401 | NA   | 4.4E-16 | 4.4E-15 | XP_003528524.1 | auxin-binding protein ABP19a-like [Glycine max]                                                   |
| Vr185592_c0_seq1 | 0      | 0     | 237    | 8.84102 | NA   | 4.4E-16 | 4.4E-15 | NP_001241164.1 | phosphate transporter 1-7-like [Glycine max]                                                      |
| Vr48482_c0_seq1  | 0      | 0     | 207    | 9.75698 | NA   | 4.4E-16 | 4.4E-15 | XP_003551393.1 | probable LRR receptor-like serine/threonine-protein kinase At4g26540-like isoform 1 [Glycine max] |
| Vr37067_c0_seq4  | 0      | 0     | 168    | 1.56982 | NA   | 4.4E-16 | 4.4E-15 | XP_003548678.1 | G-type lectin S-receptor-like serine/threonine-protein kinase At1g11330-like [Glycine max]        |
| Vr64026_c0_seq1  | 0      | 0     | 163    | 6.82563 | NA   | 4.4E-16 | 4.4E-15 | XP_003551603.1 | denine/guanine permease AZG1-like [Glycine max]                                                   |
| Vr12323_c0_seq1  | 0      | 0     | 144    | 2.91301 | NA   | 4.4E-16 | 4.4E-15 | XP_003545985.1 | polygalacturonase-like [Glycine max]                                                              |
| Vr10342_c0_seq1  | 0      | 0     | 141    | 1.62646 | NA   | 4.4E-16 | 4.4E-15 | XP_003519899.1 | cytochrome P450 90B1-like [Glycine max]                                                           |



|                  |       |      |       |         |        |         |         |                |                                                                                 |
|------------------|-------|------|-------|---------|--------|---------|---------|----------------|---------------------------------------------------------------------------------|
| Vr66297_c0_seq1  | 0     | 0    | 135   | 11.9054 | NA     | 4.4E-16 | 4.4E-15 | P34952.1       | Chymotrypsin inhibitor ECI                                                      |
| Vr16293_c0_seq1  | 0     | 0    | 130   | 2.88943 | NA     | 4.4E-16 | 4.4E-15 | NP_001242396.1 | uncharacterized protein LOC100812163 precursor [Glycine max]                    |
| Vr160743_c0_seq1 | 0     | 0    | 102   | 1.58438 | NA     | 4.4E-16 | 4.4E-15 | XP_003541980.1 | transcription factor FER-LIKE IRON DEFICIENCY-INDUCED FACTOR-like [Glycine max] |
| Vr34521_c0_seq2  | 2822  | 47.5 | 1E+05 | 2117.22 | -5.477 | 2.7E-11 | 1.8E-10 | AAA66288.1     | proline-rich protein [Glycine max]                                              |
| Vr35851_c0_seq1  | 825   | 11.6 | 46041 | 791.627 | -6.093 | 0       | 0       | NP_001237786.1 | Kunitz trypsin protease inhibitor precursor [Glycine max]                       |
| Vr22610_c0_seq1  | 13    | 0.19 | 20516 | 372.845 | -10.91 | 0       | 0       | XP_003544327.1 | cationic peroxidase 1-like [Glycine max]                                        |
| Vr31128_c0_seq2  | 366   | 4.2  | 16176 | 226.783 | -5.756 | 4.8E-12 | 3.6E-11 | XP_003547616.1 | cationic peroxidase 2-like [Glycine max]                                        |
| Vr34889_c0_seq1  | 154   | 2.13 | 13312 | 225.243 | -6.724 | 1.4E-12 | 1.1E-11 | P29024.1       | Acidic endochitinase; Flags: Precursor                                          |
| Vr39225_c0_seq1  | 133   | 2.02 | 12040 | 223.697 | -6.791 | 6.3E-13 | 5.2E-12 | XP_003534655.1 | cationic peroxidase 1-like [Glycine max]                                        |
| Vr38890_c0_seq1  | 138   | 1.28 | 10070 | 114.164 | -6.48  | 7.6E-13 | 6.2E-12 | XP_003536300.1 | 7-ethoxycoumarin O-deethylase-like [Glycine max]                                |
| Vr39450_c0_seq1  | 136   | 2.21 | 8109  | 161.311 | -6.188 | 6.8E-13 | 5.6E-12 | XP_003533952.1 | 21 kDa protein-like [Glycine max]                                               |
| Vr13838_c0_seq1  | 11    | 0.08 | 7752  | 70.0421 | -9.752 | 0       | 0       | XP_003518665.1 | polygalacturonase At1g48100-like [Glycine max]                                  |
| Vr39180_c0_seq1  | 2     | 0.04 | 7480  | 166.842 | -12.16 | 4.4E-16 | 4.4E-15 | XP_003538325.1 | cationic peroxidase 1-like [Glycine max]                                        |
| Vr34333_c0_seq1  | 170   | 2    | 7123  | 102.645 | -5.679 | 6E-13   | 5E-12   | NP_001236116.1 | uncharacterized protein LOC100500048 precursor [Glycine max]                    |
| Vr36526_c0_seq1  | 174.5 | 6.49 | 5962  | 270.993 | -5.385 | 5.6E-13 | 4.7E-12 | ABS70717.1     | pathogen-related protein [Vigna angularis]                                      |
| Vr39755_c0_seq1  | 92    | 0.86 | 5637  | 64.1347 | -6.228 | 0       | 0       | NP_001238091.1 | polygalacturonase PG1 precursor [Glycine max]                                   |
| Vr40472_c0_seq1  | 109   | 1.22 | 4060  | 55.656  | -5.51  | 0       | 0       | CAA61279.1     | basic chitinase class 3 [Vigna unguiculata]                                     |
| Vr39039_c0_seq1  | 52    | 0.82 | 3989  | 76.9527 | -6.552 | 6.3E-14 | 5.5E-13 | ADX66343.1     | pathogenesis-related protein [Glycine max]                                      |
| Vr44673_c0_seq1  | 82    | 1.26 | 3255  | 61.1892 | -5.601 | 0       | 0       | XP_003539771.1 | vignain-like [Glycine max]                                                      |
| Vr46251_c0_seq1  | 30    | 0.24 | 2892  | 28.5278 | -6.882 | 5.4E-14 | 4.8E-13 | XP_003517028.1 | pectinesterase 2-like [Glycine max]                                             |
| Vr22850_c0_seq1  | 88    | 0.84 | 2822  | 32.9898 | -5.294 | 0       | 0       | NP_001241330.1 | uncharacterized protein LOC100808391 [Glycine max]                              |
| Vr34411_c0_seq1  | 6     | 0.05 | 2782  | 28.5616 | -9.148 | 0       | 0       | XP_003521576.1 | endoglucanase 17-like [Glycine max]                                             |
| Vr41032_c0_seq1  | 51    | 0.79 | 2736  | 51.6866 | -6.036 | 8E-14   | 7E-13   | XP_003535070.1 | peroxidase C3-like isoform 2 [Glycine max]                                      |
| Vr31555_c0_seq1  | 48    | 0.38 | 2186  | 21.0853 | -5.8   | 9.5E-14 | 8.2E-13 | XP_003521608.1 | sex determination protein tasselseed-2-like [Glycine max]                       |
| Vr40216_c0_seq1  | 47    | 1.2  | 2120  | 66.183  | -5.786 | 8.7E-14 | 7.6E-13 | XP_003535071.1 | peroxidase C3-like isoform 3 [Glycine max]                                      |
| Vr42825_c0_seq1  | 47    | 0.68 | 2087  | 36.8778 | -5.763 | 8.7E-14 | 7.6E-13 | XP_003542895.1 | endo-1,3,1,4-beta-D-glucanase-like [Glycine max]                                |
| Vr35020_c0_seq1  | 50    | 0.66 | 1955  | 31.5186 | -5.58  | 1E-13   | 8.7E-13 | XP_003539707.1 | uncharacterized protein LOC100784571 [Glycine max]                              |
| Vr41271_c0_seq1  | 66    | 0.83 | 1918  | 29.6483 | -5.152 | 0       | 0       | ACM89628.1     | TIR-NBS-LRR type disease resistance protein [Glycine max]                       |
| Vr42199_c0_seq1  | 14    | 0.15 | 1858  | 23.72   | -7.343 | 0       | 0       | XP_003528650.1 | ethylene-responsive transcription factor ERF086-like [Glycine max]              |
| Vr41762_c0_seq1  | 1     | 0.01 | 1669  | 20.0373 | -11    | 8.9E-16 | 8.6E-15 | XP_003556683.1 | polygalacturonase-like [Glycine max]                                            |
| Vr45152_c0_seq1  | 22    | 0.39 | 1579  | 33.99   | -6.456 | 3.6E-14 | 3.3E-13 | XP_003527180.1 | blue copper protein-like [Glycine max]                                          |
| Vr39778_c0_seq1  | 19    | 0.93 | 1532  | 91.3324 | -6.624 | 1.7E-14 | 1.6E-13 | XP_003552297.1 | cationic peroxidase 1-like [Glycine max]                                        |

|                 |    |      |      |         |        |         |         |                |                                                               |
|-----------------|----|------|------|---------|--------|---------|---------|----------------|---------------------------------------------------------------|
| Vr46582_c0_seq1 | 8  | 0.14 | 1486 | 30.6768 | -7.828 | 0       | 0       | NP_001241331.1 | uncharacterized protein LOC100811719 precursor [Glycine max]  |
| Vr59584_c0_seq1 | 43 | 0.59 | 1296 | 21.8322 | -5.204 | 7.3E-14 | 6.4E-13 | XP_003543376.1 | early nodulin-like protein 1-like [Glycine max]               |
| Vr36698_c0_seq1 | 34 | 0.64 | 1294 | 29.645  | -5.54  | 4.6E-14 | 4.1E-13 | P0DI40.1       | Casparian strip membrane protein 2                            |
| Vr50416_c0_seq1 | 12 | 0.1  | 1158 | 11.7687 | -6.883 | 0       | 0       | XP_003548705.1 | D-inositol-3-phosphate glycosyltransferase-like [Glycine max] |
| Vr18948_c0_seq1 | 18 | 0.11 | 1081 | 7.77121 | -6.199 | 1.1E-14 | 1E-13   | XP_003553810.1 | potassium transporter 5-like [Glycine max]                    |
| Vr44815_c0_seq1 | 37 | 0.24 | 1059 | 8.48303 | -5.13  | 5.1E-14 | 4.5E-13 | XP_003529133.1 | laccase-9-like [Glycine max]                                  |

## Top 50 DGEs Con :Wat24 -Down

| Gene_ID          | Length | Reads1 | RPKM1  | Reads2 | RPKM2 | Log2 | P-value  | FDR      | NR             | Description                                                         |
|------------------|--------|--------|--------|--------|-------|------|----------|----------|----------------|---------------------------------------------------------------------|
| Vr12598_c0_seq1  | 1156   | 506    | 6.85   | 0      | 0.00  | NA   | 5.5E-132 | 1.6E-130 | XP_003517303.1 | transcription factor HEC1-like [Glycine max]                        |
| Vr108548_c0_seq1 | 241    | 176    | 11.43  | 0      | 0.00  | NA   | 2.35E-46 | 4.2E-45  | ABG56534.1     | polyprotein precursor [Bean common mosaic virus]                    |
| Vr123225_c0_seq1 | 232    | 167    | 11.23  | 0      | 0.00  | NA   | 9.25E-44 | 1.6E-42  | AGS41513.1     | HC-Pro, partial [Bean common mosaic virus strain peanut stripe]     |
| Vr20601_c0_seq1  | 742    | 158    | 3.32   | 0      | 0.00  | NA   | 2E-41    | 3.37E-40 | XP_004509731.1 | uncharacterized protein LOC101508712 [Cicer arietinum]              |
| Vr34044_c0_seq3  | 587    | 116    | 3.09   | 0      | 0.00  | NA   | 8.72E-31 | 1.26E-29 | XP_004492294.1 | uncharacterized protein LOC101515081 [Cicer arietinum]              |
| Vr28706_c0_seq1  | 250    | 111    | 6.95   | 0      | 0.00  | NA   | 1.73E-29 | 2.45E-28 | AAX82171.1     | polyprotein [Bean common mosaic virus strain peanut stripe]         |
| Vr748356_c0_seq1 | 1589   | 105    | 1.03   | 0      | 0.00  | NA   | 6.24E-28 | 8.6E-27  | XP_004510150.1 | protein ECERIFERUM 1-like [Cicer arietinum]                         |
| Vr30105_c0_seq1  | 268    | 103    | 6.01   | 0      | 0.00  | NA   | 2.06E-27 | 2.81E-26 | XP_003541676.1 | serine carboxypeptidase-like 12-like [Glycine max]                  |
| Vr533222_c0_seq1 | 999    | 101    | 1.58   | 0      | 0.00  | NA   | 6.81E-27 | 9.18E-26 | XP_003542039.1 | laccase-17-like [Glycine max]                                       |
| Vr38043_c0_seq1  | 10052  | 12585  | 19.59  | 63     | 0.12  | 7.35 | 0        | 0        | ACE95704.1     | polyprotein precursor [Bean common mosaic virus]                    |
| Vr48206_c0_seq1  | 869    | 3644   | 65.60  | 70     | 1.54  | 5.41 | 0        | 0        | XP_003523924.1 | auxin-induced protein 5NG4-like [Glycine max]                       |
| Vr27182_c0_seq1  | 2039   | 806    | 6.18   | 8      | 0.08  | 6.36 | 6.2E-194 | 2E-192   | XP_003529007.1 | protein WAX2-like [Glycine max]                                     |
| Vr72740_c0_seq1  | 1426   | 729    | 8.00   | 18     | 0.24  | 5.05 | 3E-160   | 9.1E-159 | XP_003535206.1 | peptide transporter PTR3-A-like [Glycine max]                       |
| Vr72751_c0_seq1  | 1496   | 699    | 7.31   | 17     | 0.22  | 5.07 | 4.8E-154 | 1.5E-152 | XP_003536954.1 | GDSL esterase/lipase At4g28780-like [Glycine max]                   |
| Vr22359_c0_seq1  | 1622   | 11841  | 114.22 | 404    | 4.77  | 4.58 | 0        | 0        | XP_003531568.1 | auxin-induced protein 5NG4-like [Glycine max]                       |
| Vr38378_c0_seq1  | 862    | 7422   | 134.71 | 375    | 8.33  | 4.02 | 0        | 0        | AAV51975.1     | GIR1 [Vigna radiata]                                                |
| Vr13211_c1_seq1  | 1273   | 5205   | 63.97  | 244    | 3.67  | 4.12 | 0        | 0        | XP_003550171.1 | uncharacterized protein LOC100813910 [Glycine max]                  |
| Vr55469_c0_seq1  | 2026   | 3578   | 27.63  | 141    | 1.33  | 4.37 | 0        | 0        | XP_003537193.1 | auxin-induced protein 5NG4-like isoform 1 [Glycine max]             |
| Vr45510_c0_seq1  | 1532   | 1959   | 20.01  | 54     | 0.67  | 4.89 | 0        | 0        | XP_003521784.1 | GDSL esterase/lipase At5g33370-like [Glycine max]                   |
| Vr101604_c0_seq1 | 1616   | 802    | 7.76   | 33     | 0.39  | 4.31 | 5.2E-161 | 1.6E-159 | XP_003554335.1 | probable pectate lyase 3-like [Glycine max]                         |
| Vr112545_c0_seq1 | 951    | 753    | 12.39  | 34     | 0.68  | 4.18 | 3.7E-148 | 1.1E-146 | XP_003529396.1 | ethylene-responsive transcription factor ERF109-like [Glycine max]  |
| Vr57343_c0_seq1  | 405    | 673    | 26.00  | 33     | 1.56  | 4.06 | 5.5E-130 | 1.6E-128 | NP_001236386.1 | uncharacterized protein LOC100306533 [Glycine max]                  |
| Vr30607_c0_seq1  | 1539   | 639    | 6.50   | 26     | 0.32  | 4.33 | 6.6E-129 | 1.9E-127 | XP_003553275.1 | GDSL esterase/lipase At5g33370-like [Glycine max]                   |
| Vr72294_c0_seq1  | 737    | 529    | 11.23  | 23     | 0.60  | 4.23 | 1.9E-105 | 5E-104   | XP_003538774.1 | nitrate transporter 1.5-like [Glycine max]                          |
| Vr34550_c0_seq2  | 1431   | 40042  | 437.80 | 2952   | 39.48 | 3.47 | 0        | 0        | AAW27915.1     | xyloglucan endotransglucosylase/hydrolase precursor [Vigna radiata] |

|                 |      |        |         |       |        |      |          |          |                |                                                                        |
|-----------------|------|--------|---------|-------|--------|------|----------|----------|----------------|------------------------------------------------------------------------|
| Vr31512_c0_seq1 | 1405 | 8929   | 99.43   | 661   | 9.00   | 3.47 | 0        | 0        | XP_003533364.1 | transcription factor BEE 3-like [Glycine max]                          |
| Vr44566_c0_seq1 | 1467 | 6118   | 65.25   | 396   | 5.17   | 3.66 | 0        | 0        | NP_001241603.1 | uncharacterized protein LOC100812537 [Glycine max]                     |
| Vr36885_c0_seq1 | 1753 | 4234   | 37.79   | 421   | 4.60   | 3.04 | 0        | 0        | XP_003548043.1 | isoflavone 2'-hydroxylase-like [Glycine max]                           |
| Vr39383_c0_seq1 | 806  | 4139   | 80.34   | 401   | 9.52   | 3.08 | 0        | 0        | XP_003553069.1 | uncharacterized protein LOC100788078 [Glycine max]                     |
| Vr30665_c0_seq1 | 1520 | 1694   | 17.44   | 128   | 1.61   | 3.44 | 8E-285   | 2.9E-283 | XP_003518070.1 | uncharacterized protein LOC100809248 [Glycine max]                     |
| Vr44134_c0_seq1 | 1127 | 1520   | 21.10   | 132   | 2.24   | 3.23 | 2E-242   | 6.8E-241 | XP_003534342.1 | indole-3-acetic acid-induced protein ARG7-like [Glycine max]           |
| Vr77281_c0_seq1 | 583  | 709    | 19.03   | 44    | 1.44   | 3.72 | 2.8E-128 | 8.1E-127 | XP_003538774.1 | nitrate transporter 1.5-like [Glycine max]                             |
| Vr14500_c0_seq1 | 1197 | 648    | 8.47    | 60    | 0.96   | 3.14 | 1.3E-101 | 3.5E-100 | XP_003553615.1 | uncharacterized protein LOC100785434 [Glycine max]                     |
| Vr30229_c0_seq3 | 2272 | 624    | 4.30    | 50    | 0.42   | 3.35 | 9.8E-104 | 2.5E-102 | XP_003525884.1 | transcription factor bHLH25-like [Glycine max]                         |
| Vr59002_c0_seq1 | 685  | 600    | 13.70   | 56    | 1.56   | 3.13 | 7.13E-94 | 1.78E-92 | ACU17538.1     | unknown [Glycine max]                                                  |
| Vr38010_c0_seq4 | 2806 | 503    | 2.80    | 45    | 0.31   | 3.19 | 3.75E-80 | 8.71E-79 | XP_003528365.1 | pleiotropic drug resistance protein 1-like [Glycine max]               |
| Vr38147_c0_seq1 | 1608 | 191529 | 1863.56 | 39055 | 464.80 | 2.00 | 0        | 0        | NP_001237601.1 | cationic peroxidase 2 precursor [Glycine max]                          |
| Vr40878_c0_seq1 | 1582 | 18917  | 187.09  | 2801  | 33.88  | 2.47 | 0        | 0        | AAC49758.1     | gibberellin 20-oxidase [Phaseolus vulgaris]                            |
| Vr32702_c0_seq1 | 1886 | 14859  | 123.27  | 3015  | 30.59  | 2.01 | 0        | 0        | XP_003519380.1 | uncharacterized acetyltransferase At3g50280 [Glycine max]              |
| Vr34855_c0_seq2 | 1659 | 14639  | 138.06  | 1577  | 18.19  | 2.92 | 0        | 0        | XP_003550831.1 | zinc finger Ran-binding domain-containing protein 2-like [Glycine max] |
| Vr13816_c0_seq1 | 3608 | 13084  | 56.74   | 2548  | 13.51  | 2.07 | 0        | 0        | XP_003555774.1 | transcription factor PIF3-like [Glycine max]                           |
| Vr39199_c0_seq1 | 794  | 12881  | 253.82  | 2396  | 57.75  | 2.14 | 0        | 0        | AFU81504.1     | LEA5-2.1, partial, late embryogenesis abundant [Vigna unguiculata]     |
| Vr34116_c0_seq7 | 2268 | 9555   | 65.92   | 1469  | 12.40  | 2.41 | 0        | 0        | XP_003547999.1 | uncharacterized membrane protein YOL092W-like [Glycine max]            |
| Vr43985_c0_seq1 | 1876 | 9228   | 76.96   | 1049  | 10.70  | 2.85 | 0        | 0        | XP_003549204.1 | putative nuclease HARBI1-like [Glycine max]                            |
| Vr28990_c0_seq3 | 3586 | 9216   | 40.21   | 1776  | 9.48   | 2.08 | 0        | 0        | XP_003526176.1 | chitin-inducible gibberellin-responsive protein 1-like [Glycine max]   |
| Vr41680_c0_seq1 | 1842 | 8813   | 74.86   | 961   | 9.98   | 2.91 | 0        | 0        | XP_003542412.1 | cytochrome P450 94A2-like [Glycine max]                                |
| Vr33063_c0_seq2 | 4741 | 8706   | 28.73   | 1443  | 5.82   | 2.30 | 0        | 0        | XP_004512150.1 | histidine kinase 1-like isoform X2 [Cicer arietinum]                   |
| Vr13792_c0_seq1 | 2255 | 8402   | 58.30   | 1317  | 11.18  | 2.38 | 0        | 0        | XP_003553732.1 | uncharacterized protein LOC100811813 [Glycine max]                     |
| Vr41811_c0_seq1 | 1779 | 8207   | 72.18   | 1647  | 17.72  | 2.03 | 0        | 0        | XP_003553527.1 | auxin-induced protein SNG4-like [Glycine max]                          |
| Vr33482_c1_seq4 | 2171 | 7035   | 50.70   | 1332  | 11.74  | 2.11 | 0        | 0        | NP_001242710.1 | uncharacterized protein LOC100805837 [Glycine max]                     |
